# Supplementary material
Source: PubMed Central journal article supplement (PMC2846116)

**A New Steroidal 5,7-Diene Derivative, 3 $\beta$ -Hydroxyandrosta-5, 7-Diene-17 $\beta$ -Carboxylic Acid, Shows Potent Anti-proliferative Activity**

Tae-Kang Kim<sup>1</sup>, Jianjun Chen<sup>2</sup>, Wei Li<sup>2</sup>, Jordan Zjawiony<sup>3</sup>, Duane Miller<sup>2</sup>, Zorica Janjetovic<sup>1</sup>, Robert C Tuckey<sup>4</sup>, and Andrzej Slominski<sup>1</sup>

<sup>1</sup>Department of Pathology and Laboratory Medicine, Center for Cancer Research,

<sup>2</sup>Department of Pharmaceutical Sciences, College of Pharmacy, University of Tennessee Health Science Center, Memphis, TN 38163, USA

<sup>3</sup>Department of Pharmacognosy and Research Institute of Pharmaceutical Sciences, School of Pharmacy, University of Mississippi, University, MS 38677, USA

<sup>4</sup>School of Biomedical, Biomolecular and Chemical Sciences, University of Western Australia, Crawley, WA, Australia

Kim and Chen are the first authors

**Supplementary Materials**

Compound purity determination by HPLC, UV spectra of these compounds, and complete 1D and 2D NMR spectra used for full structural assignments are included in these supplementary materials.

# 17-COOH-7DA

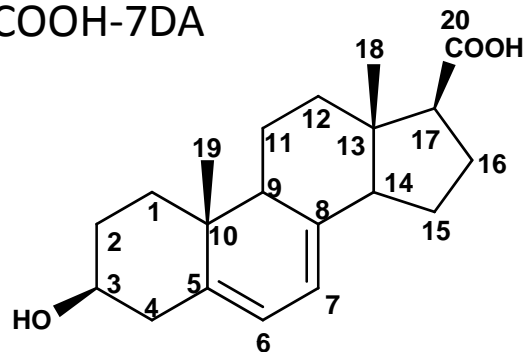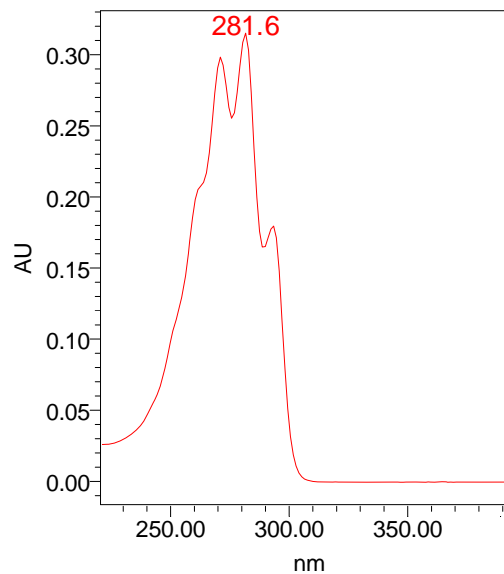

UV spectrum

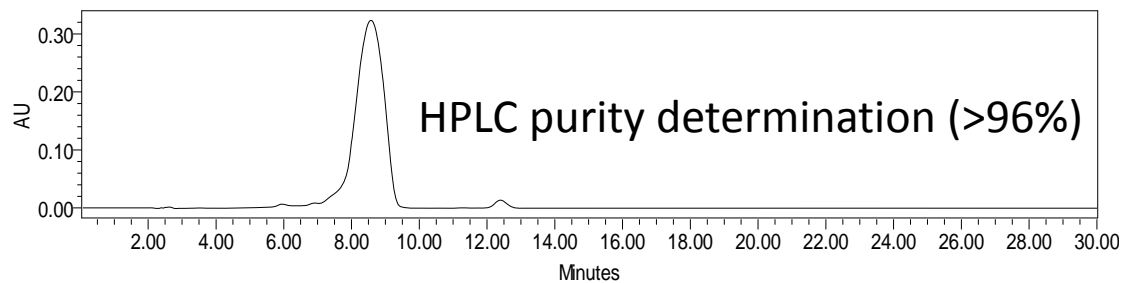

HPLC conditions: isocratic, solvent A (water, 20%) and solvent B (methanol, 80%); running time: 30 min; flow rate: 1.0 mL/min.

## Proton NMR spectrum

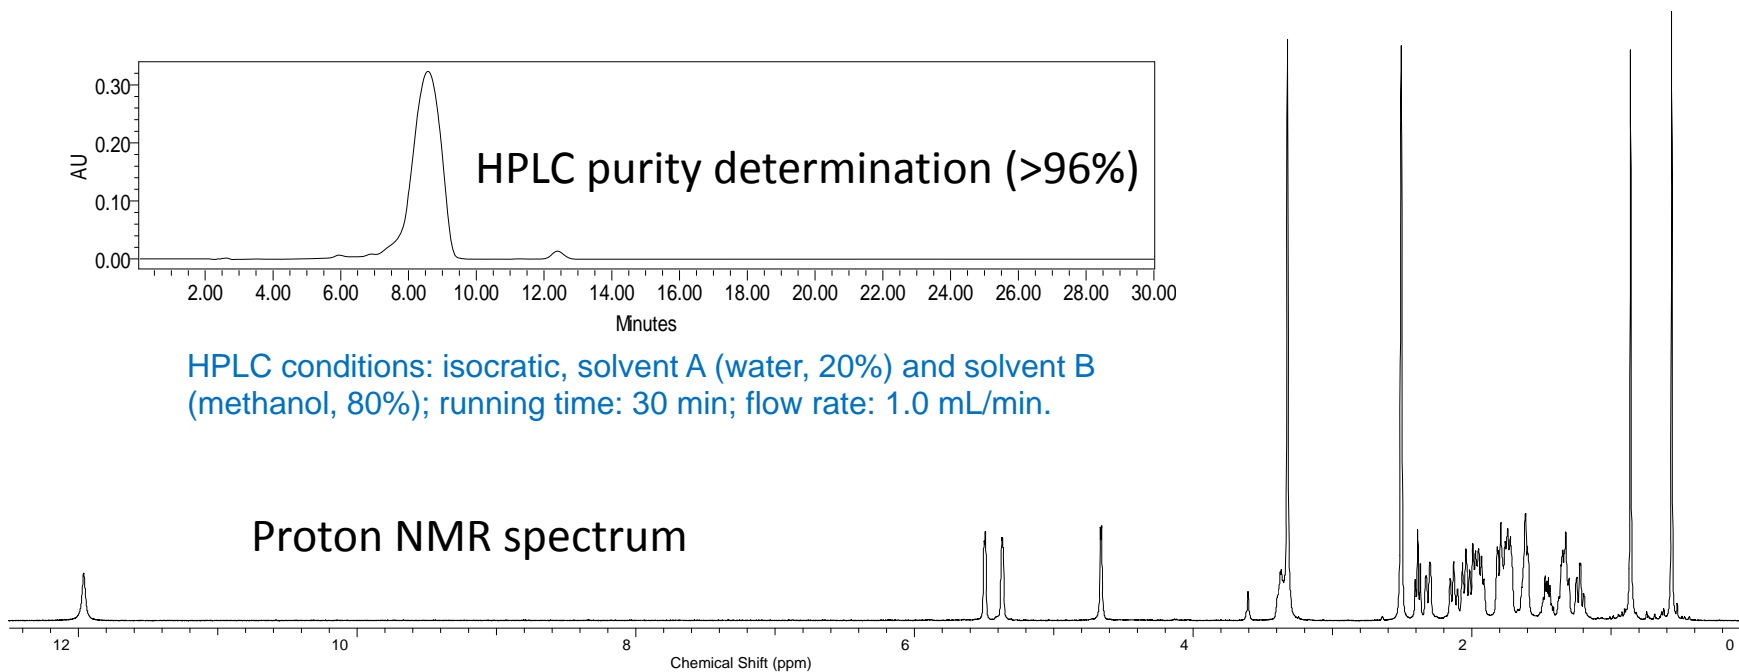

gHSQCAD\_01.fid.esp

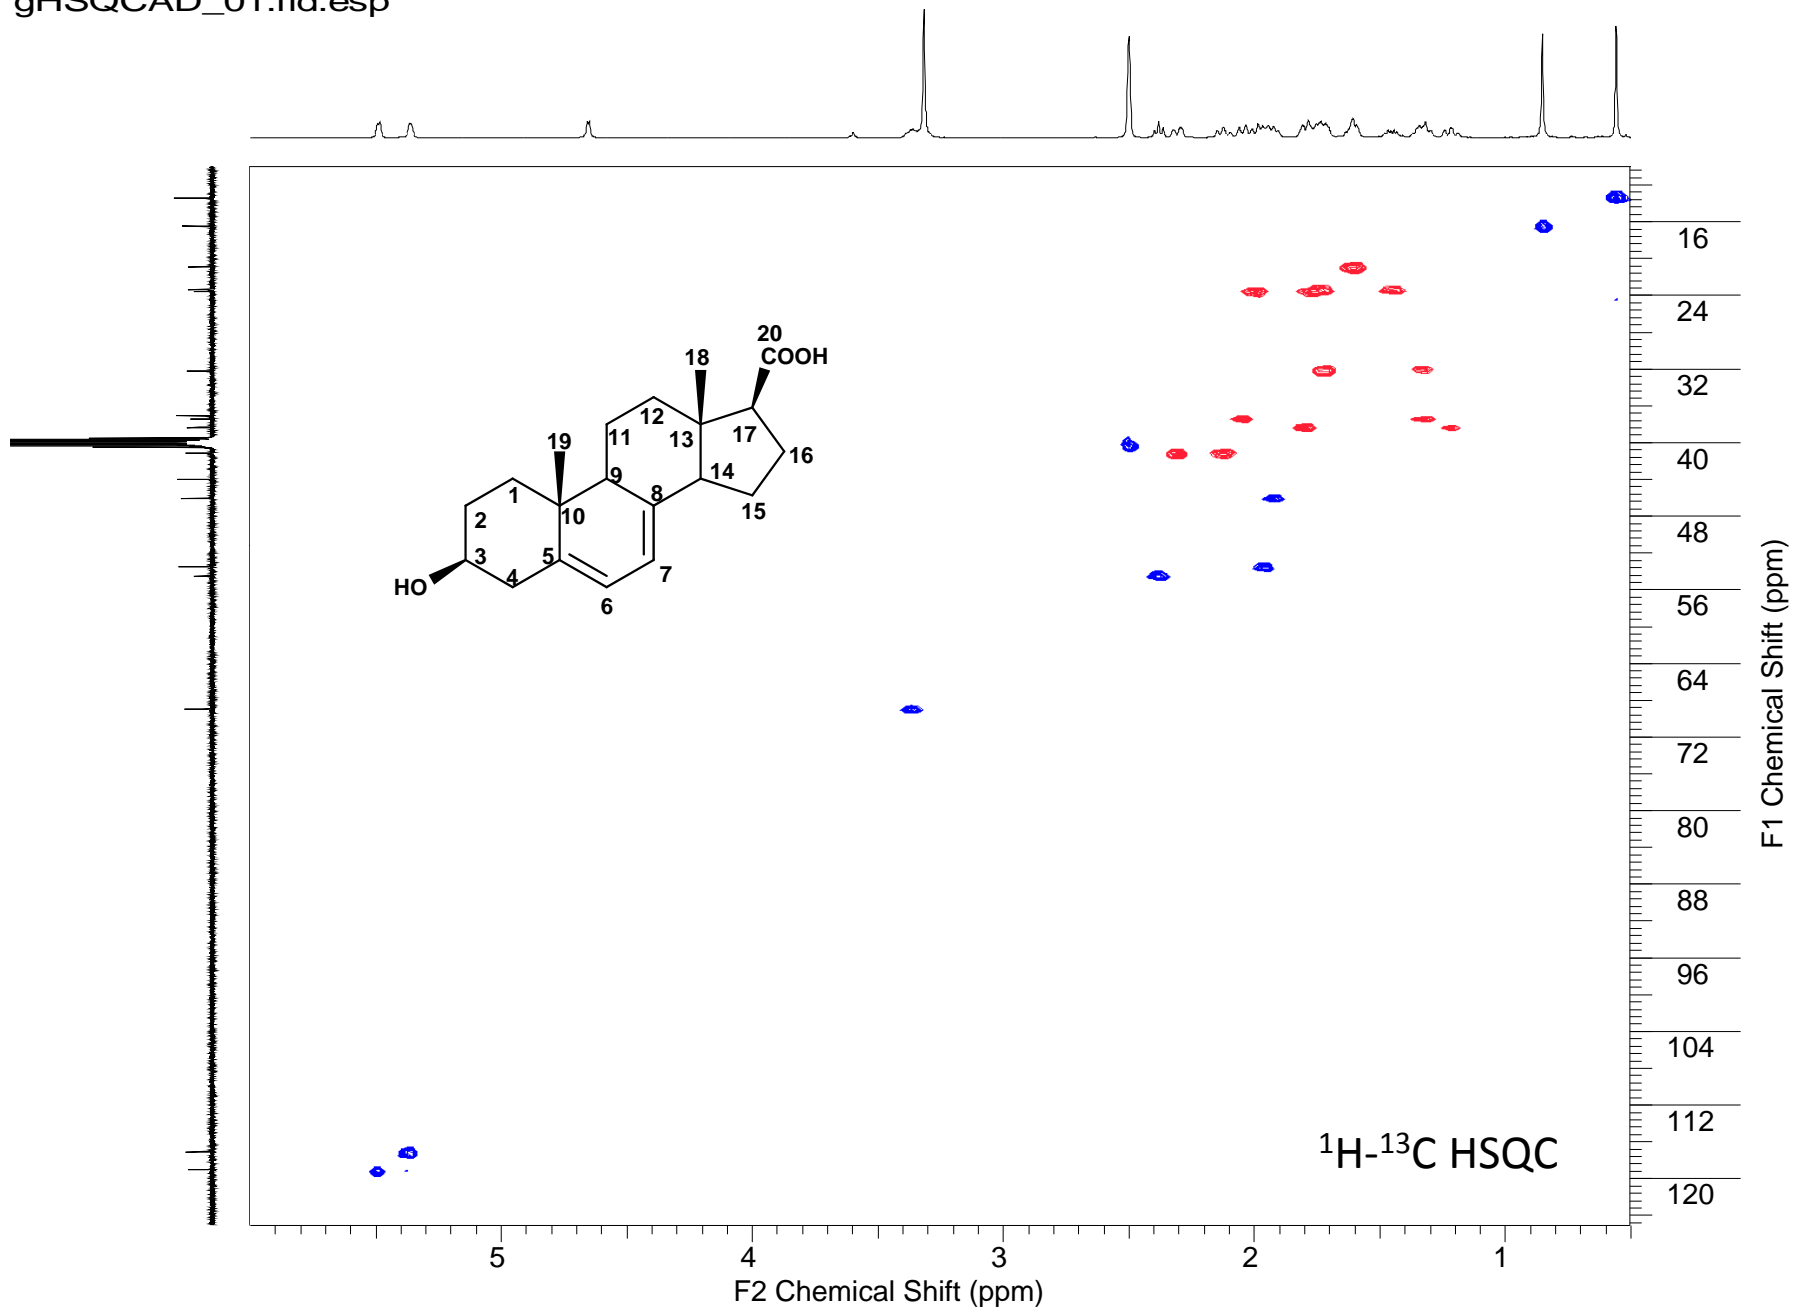

gCOSY\_01.fid.esp

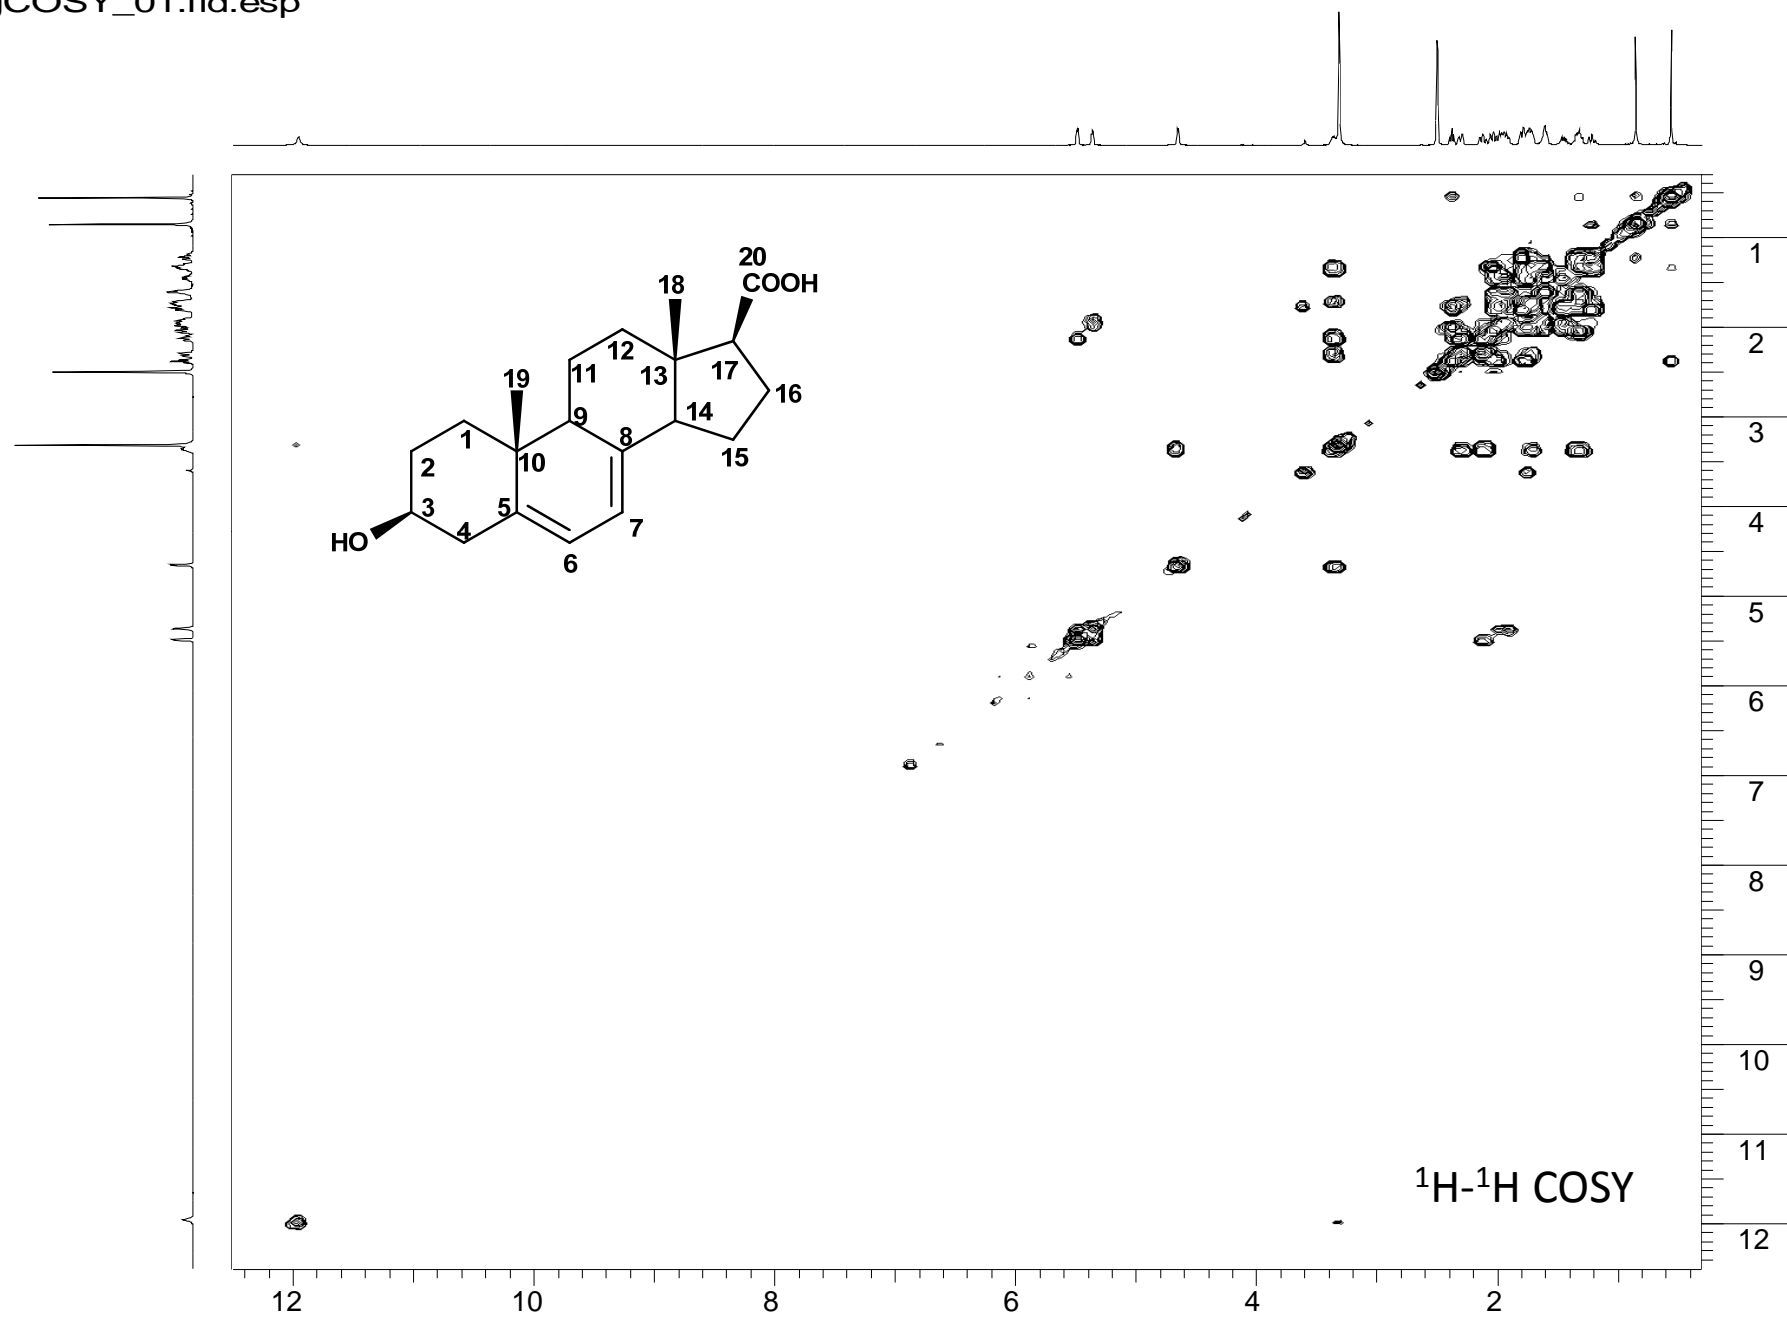

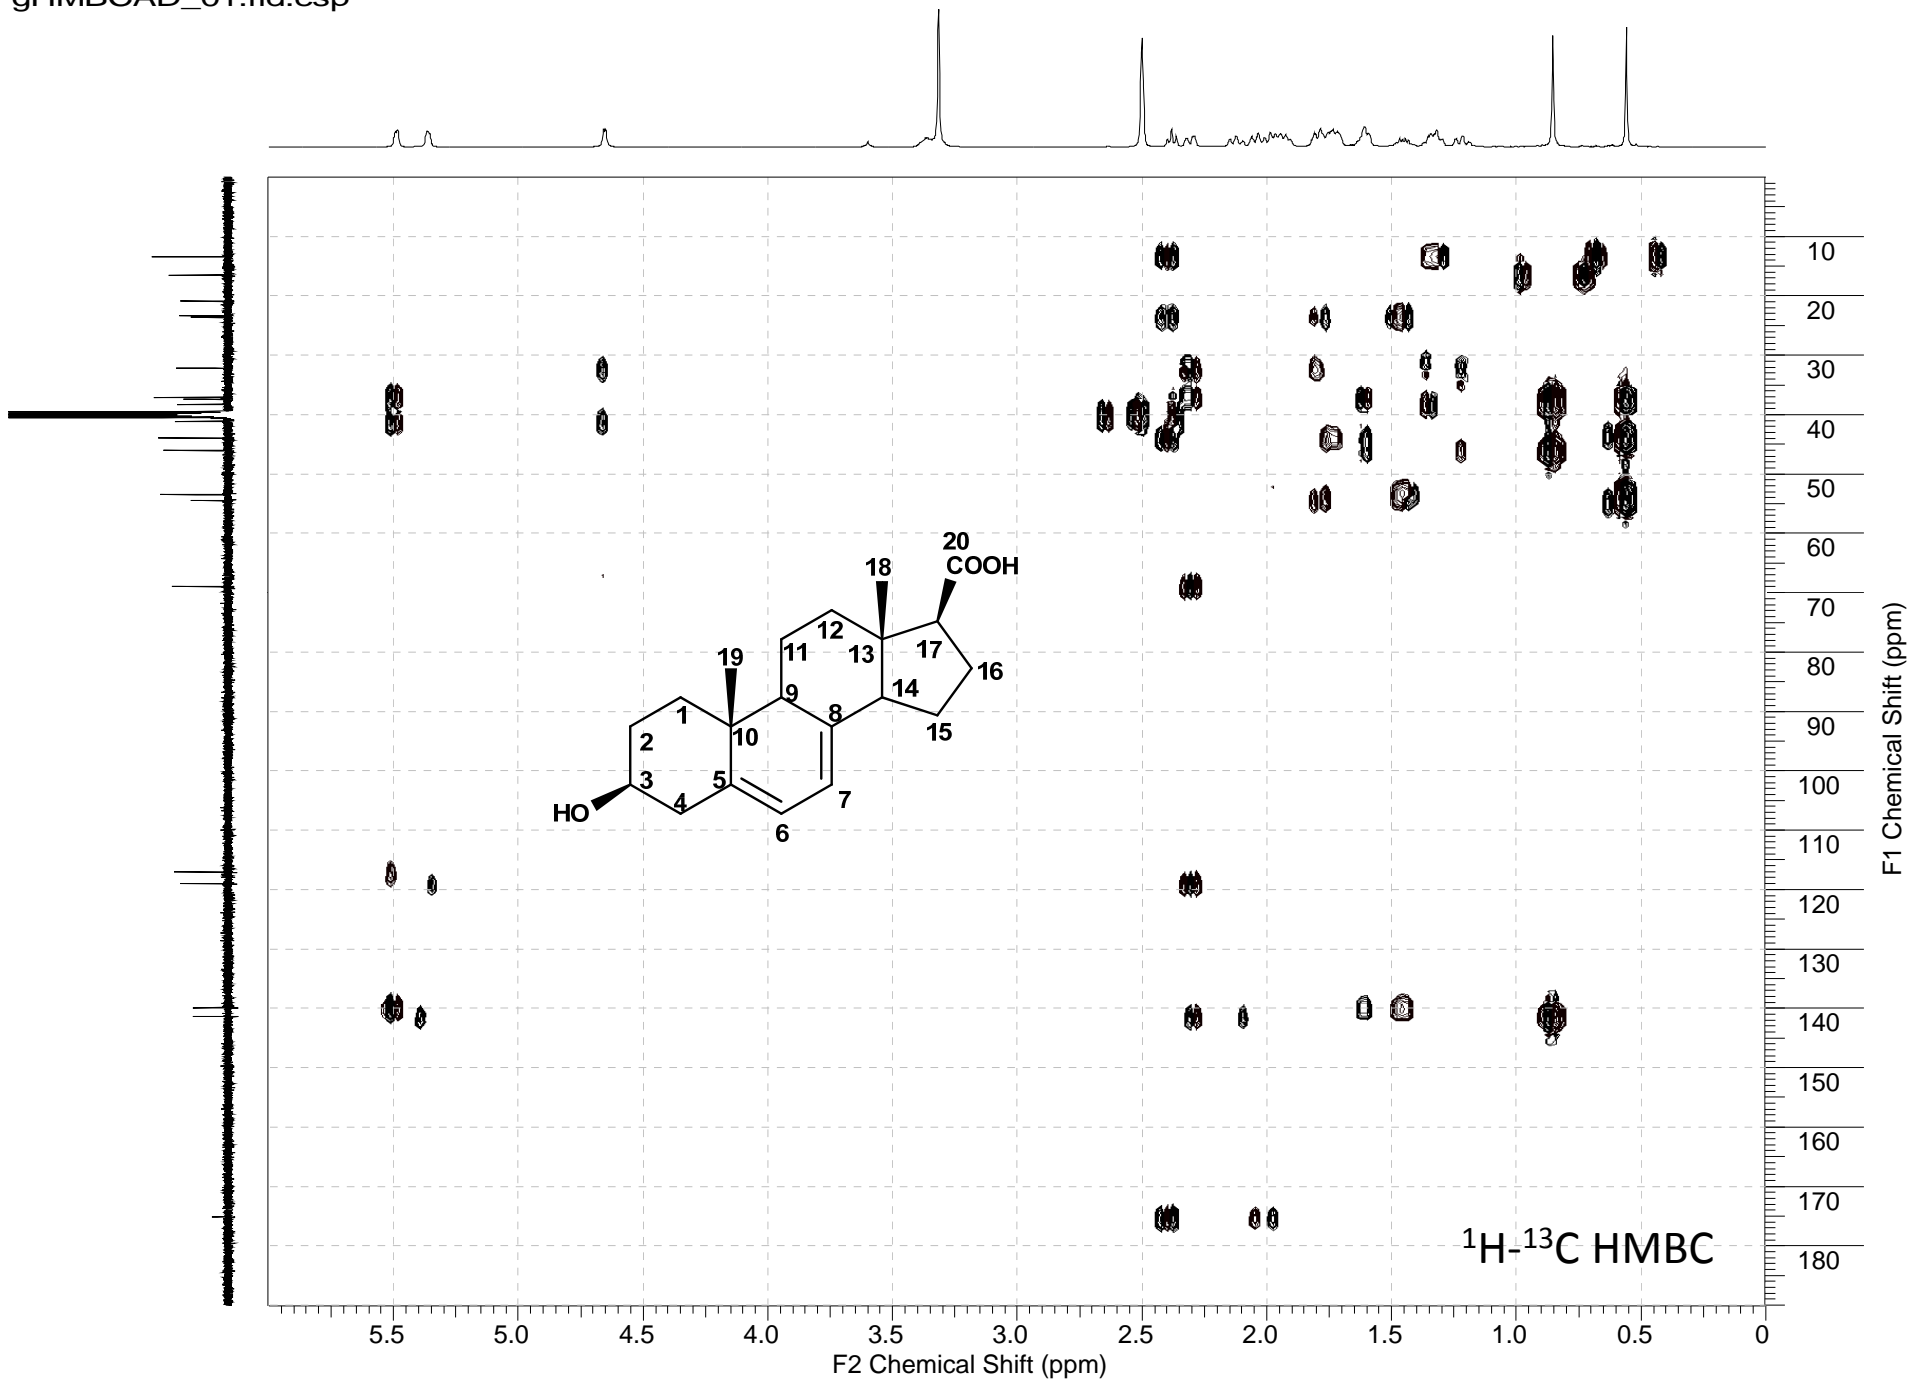

TOCSY\_01.fid.esp

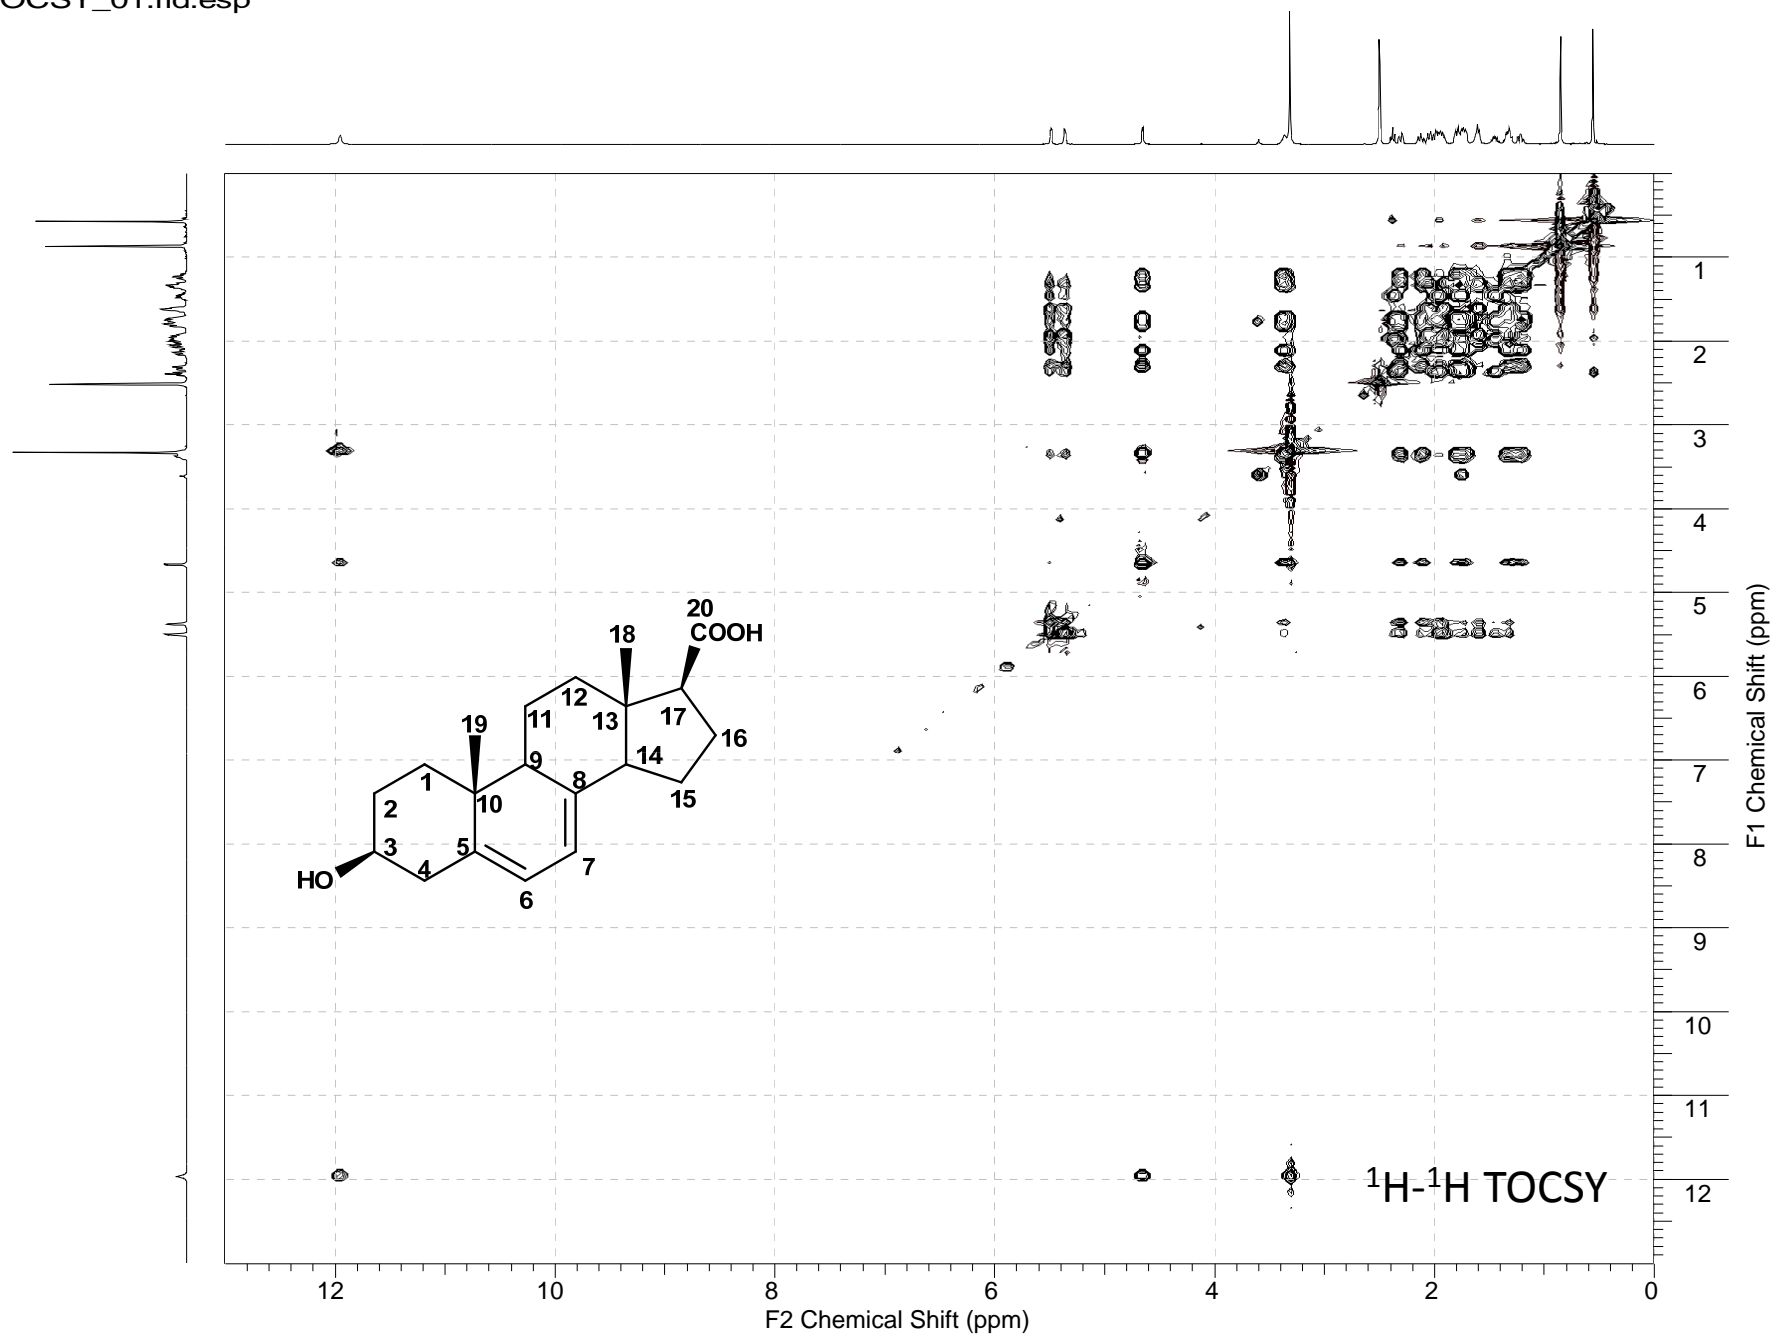

$^{13}\text{C}$  NMR

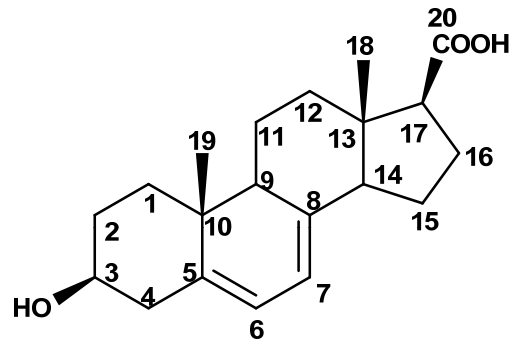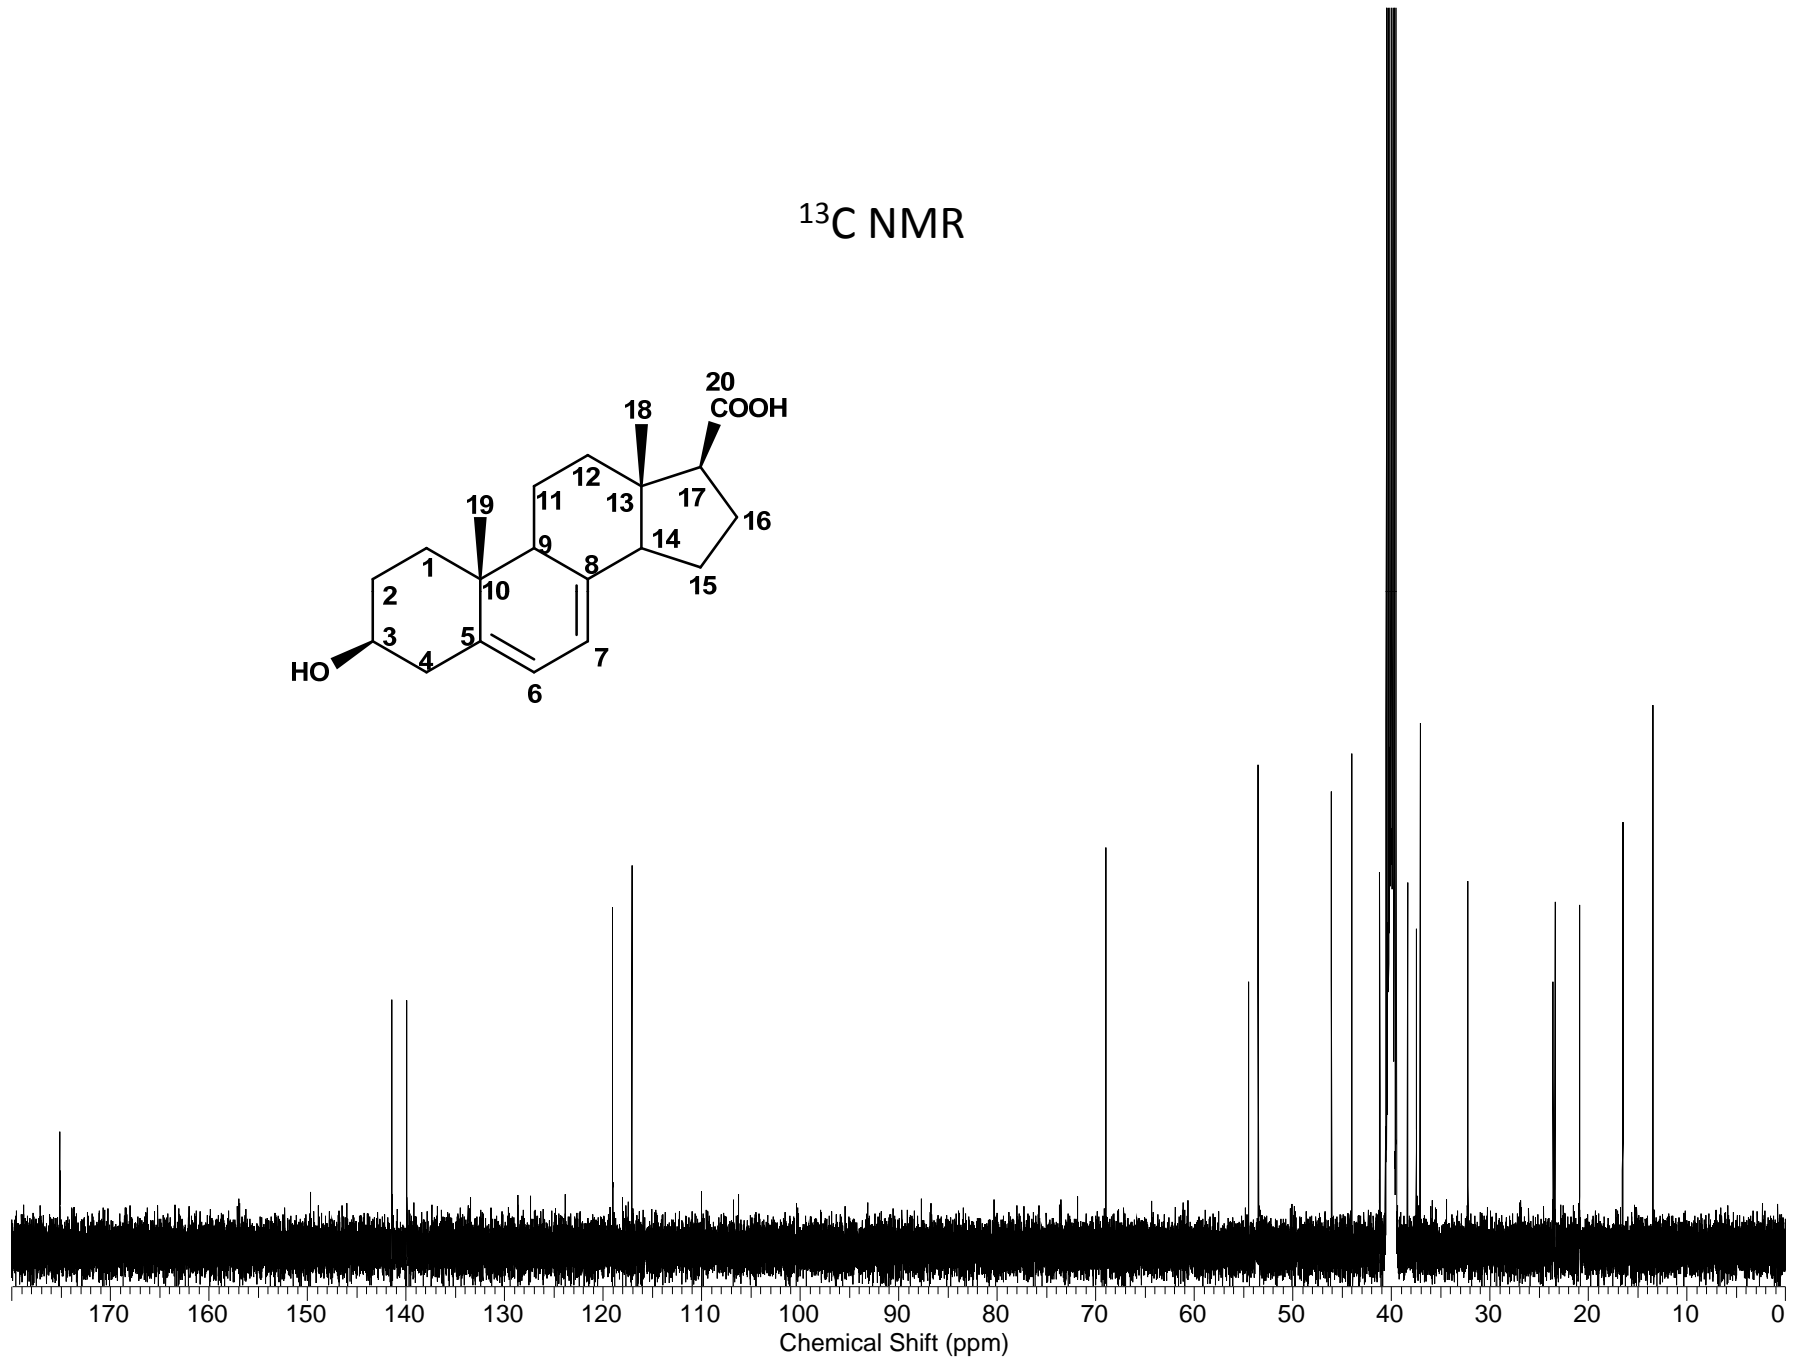

# 17-COOCH<sub>3</sub>-7DA

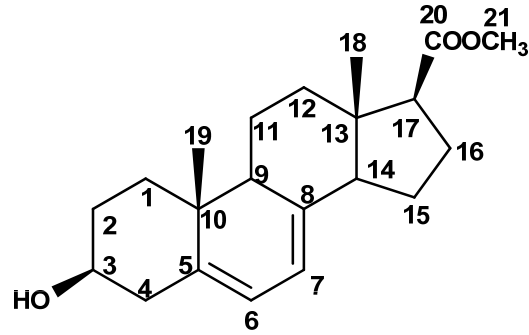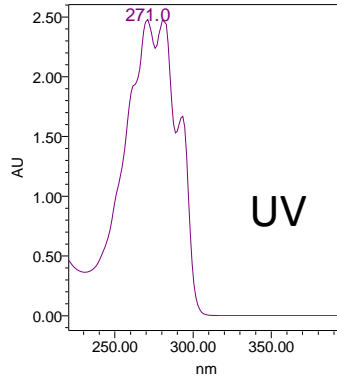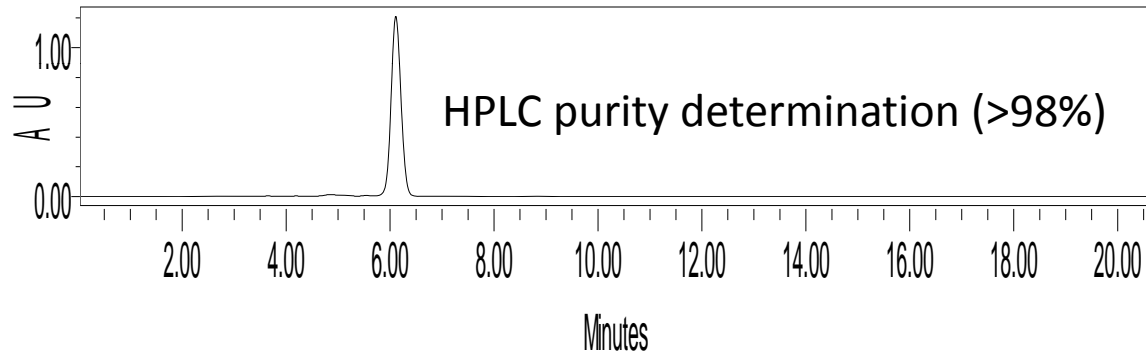

HPLC purity determination (>98%)

HPLC conditions: isocratic, solvent A (water, 10%) and solvent B (methanol, 90%); running time: 20 min; flow rate: 1.0 mL/min.

## Proton NMR spectrum

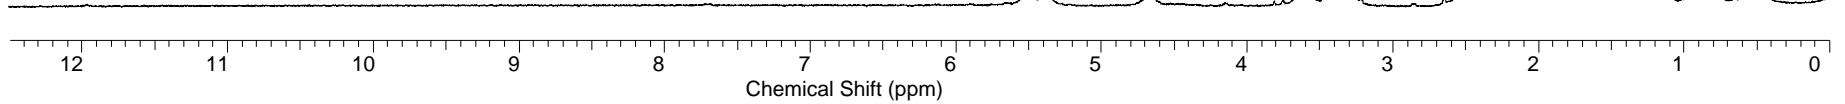



# $^{13}\text{C}$ NMR

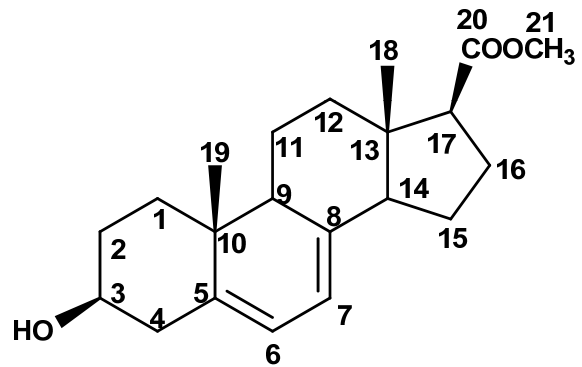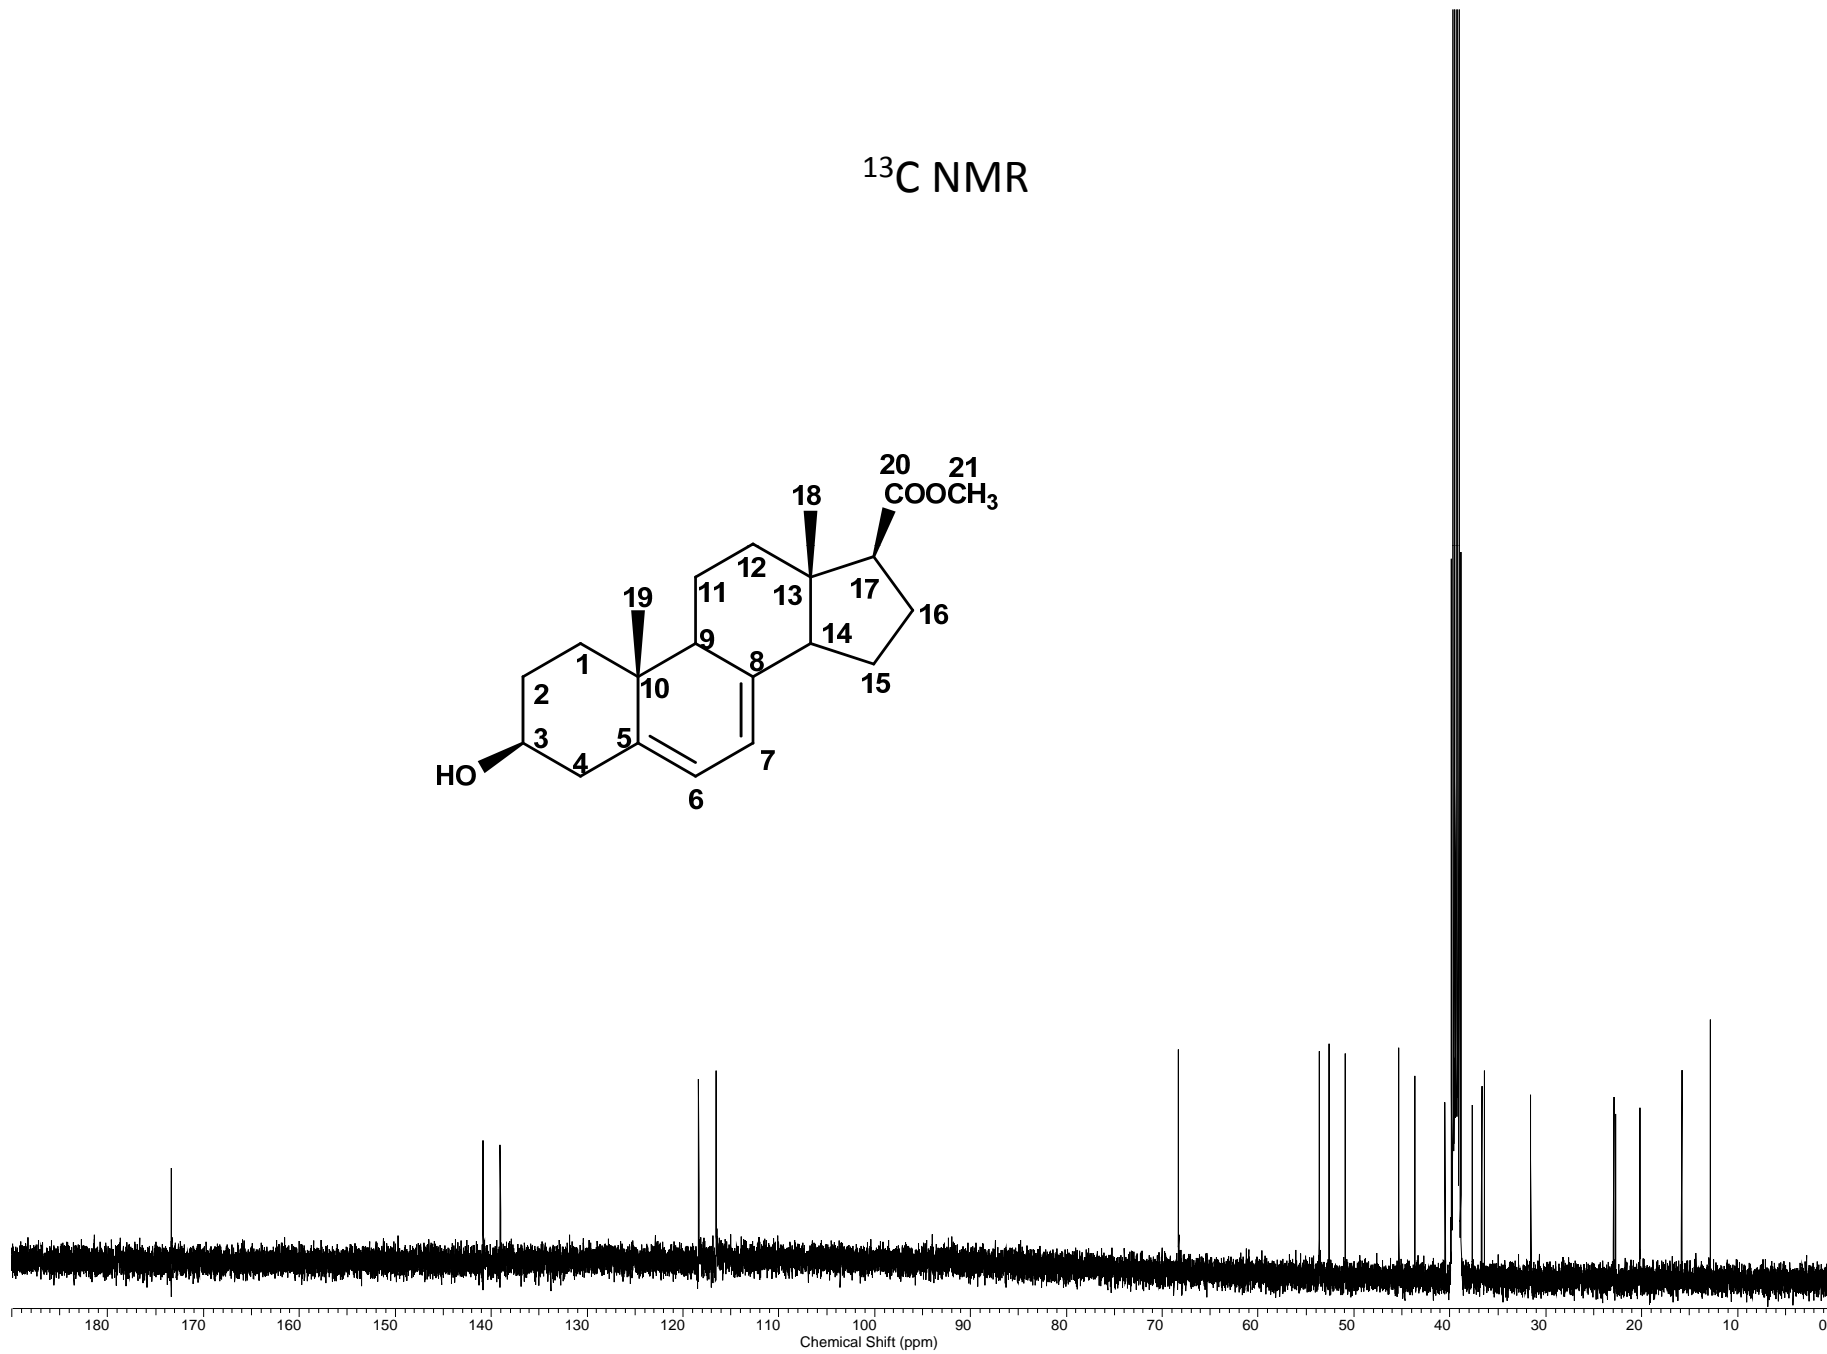

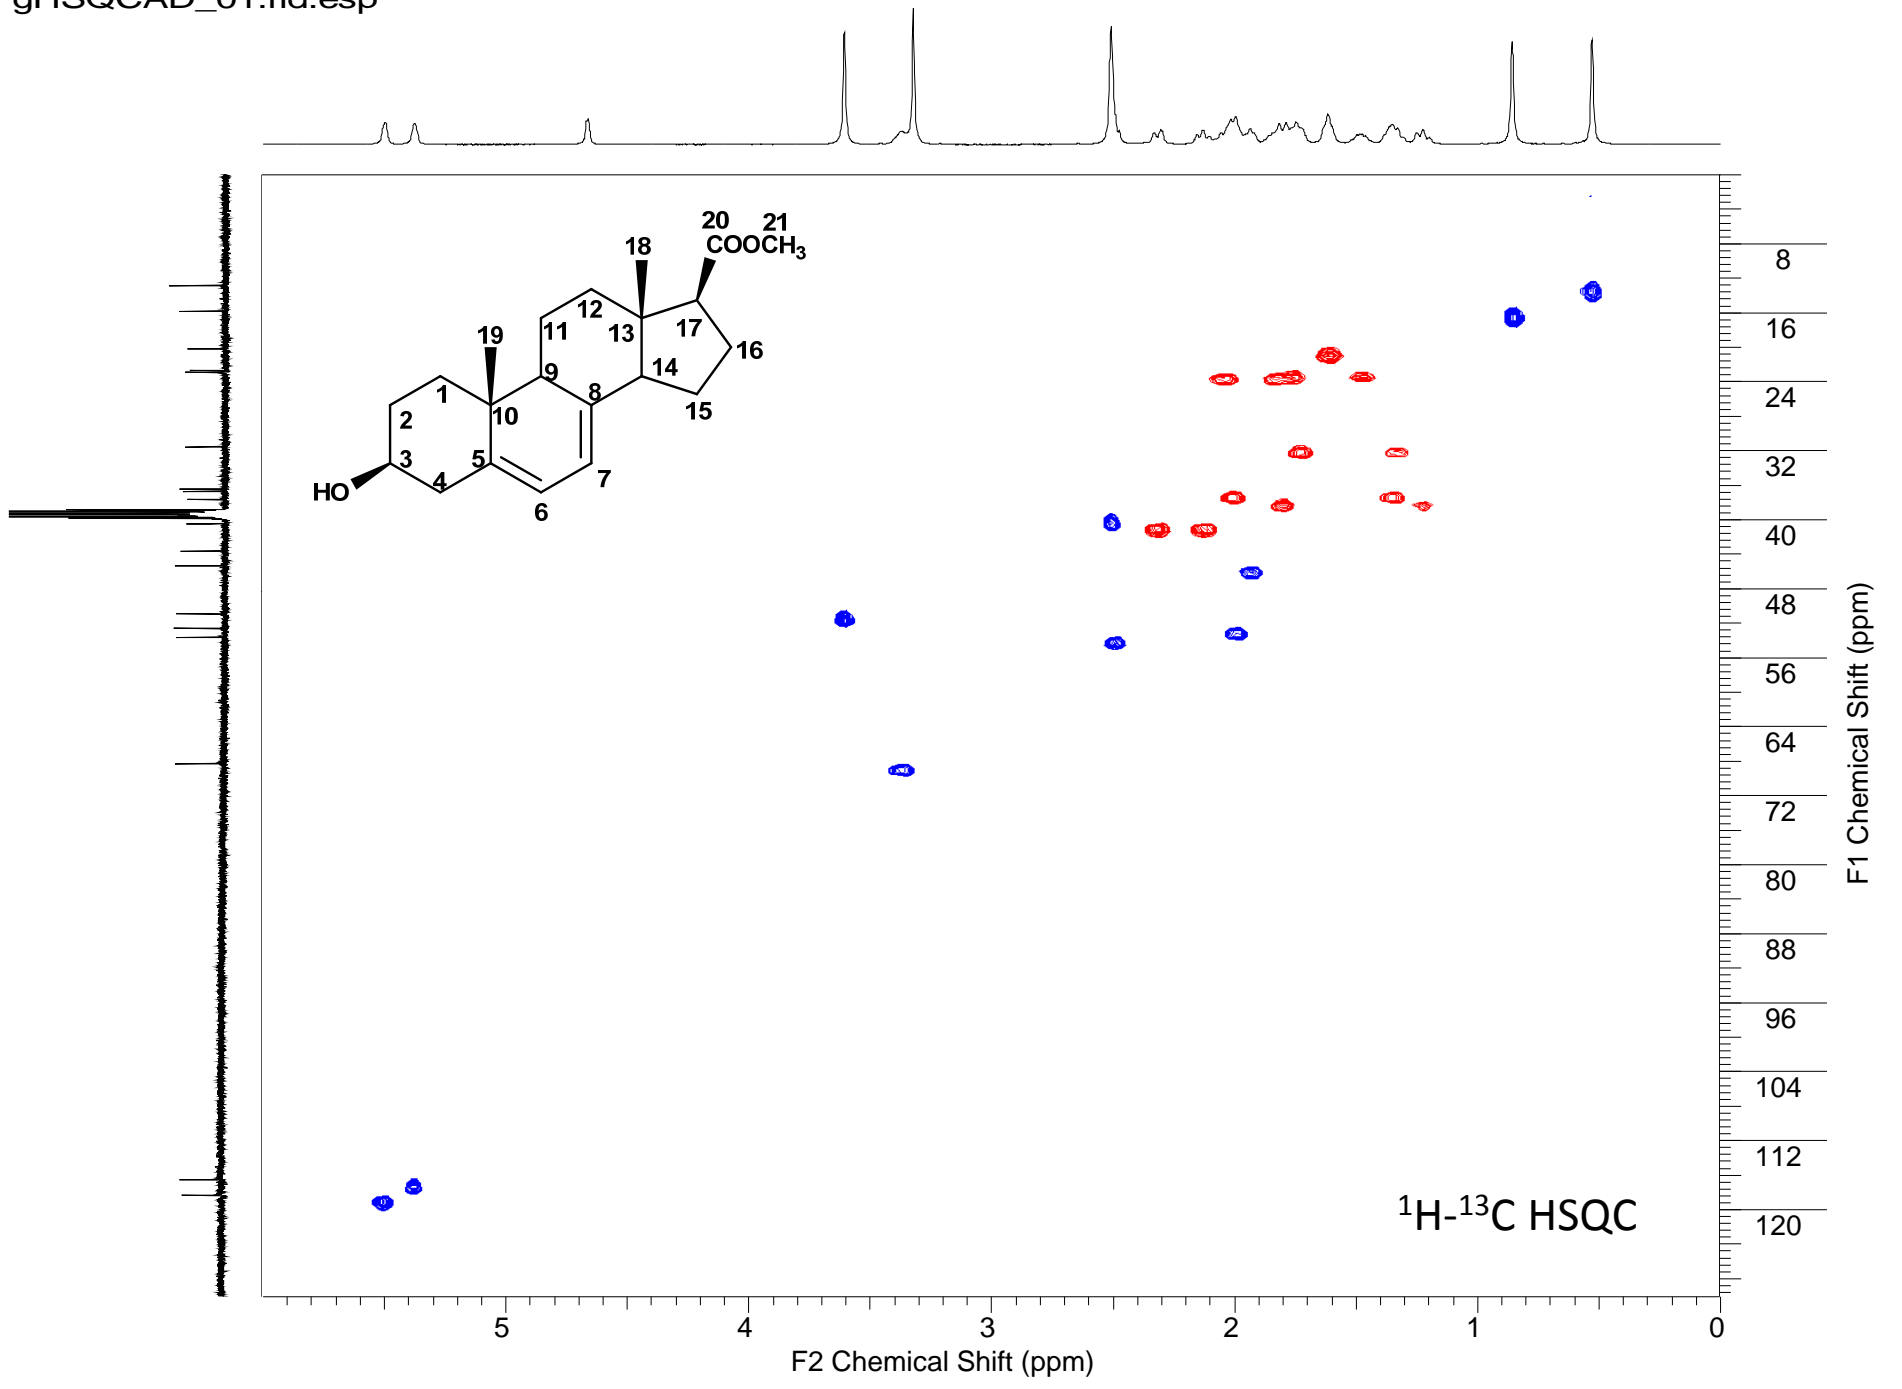

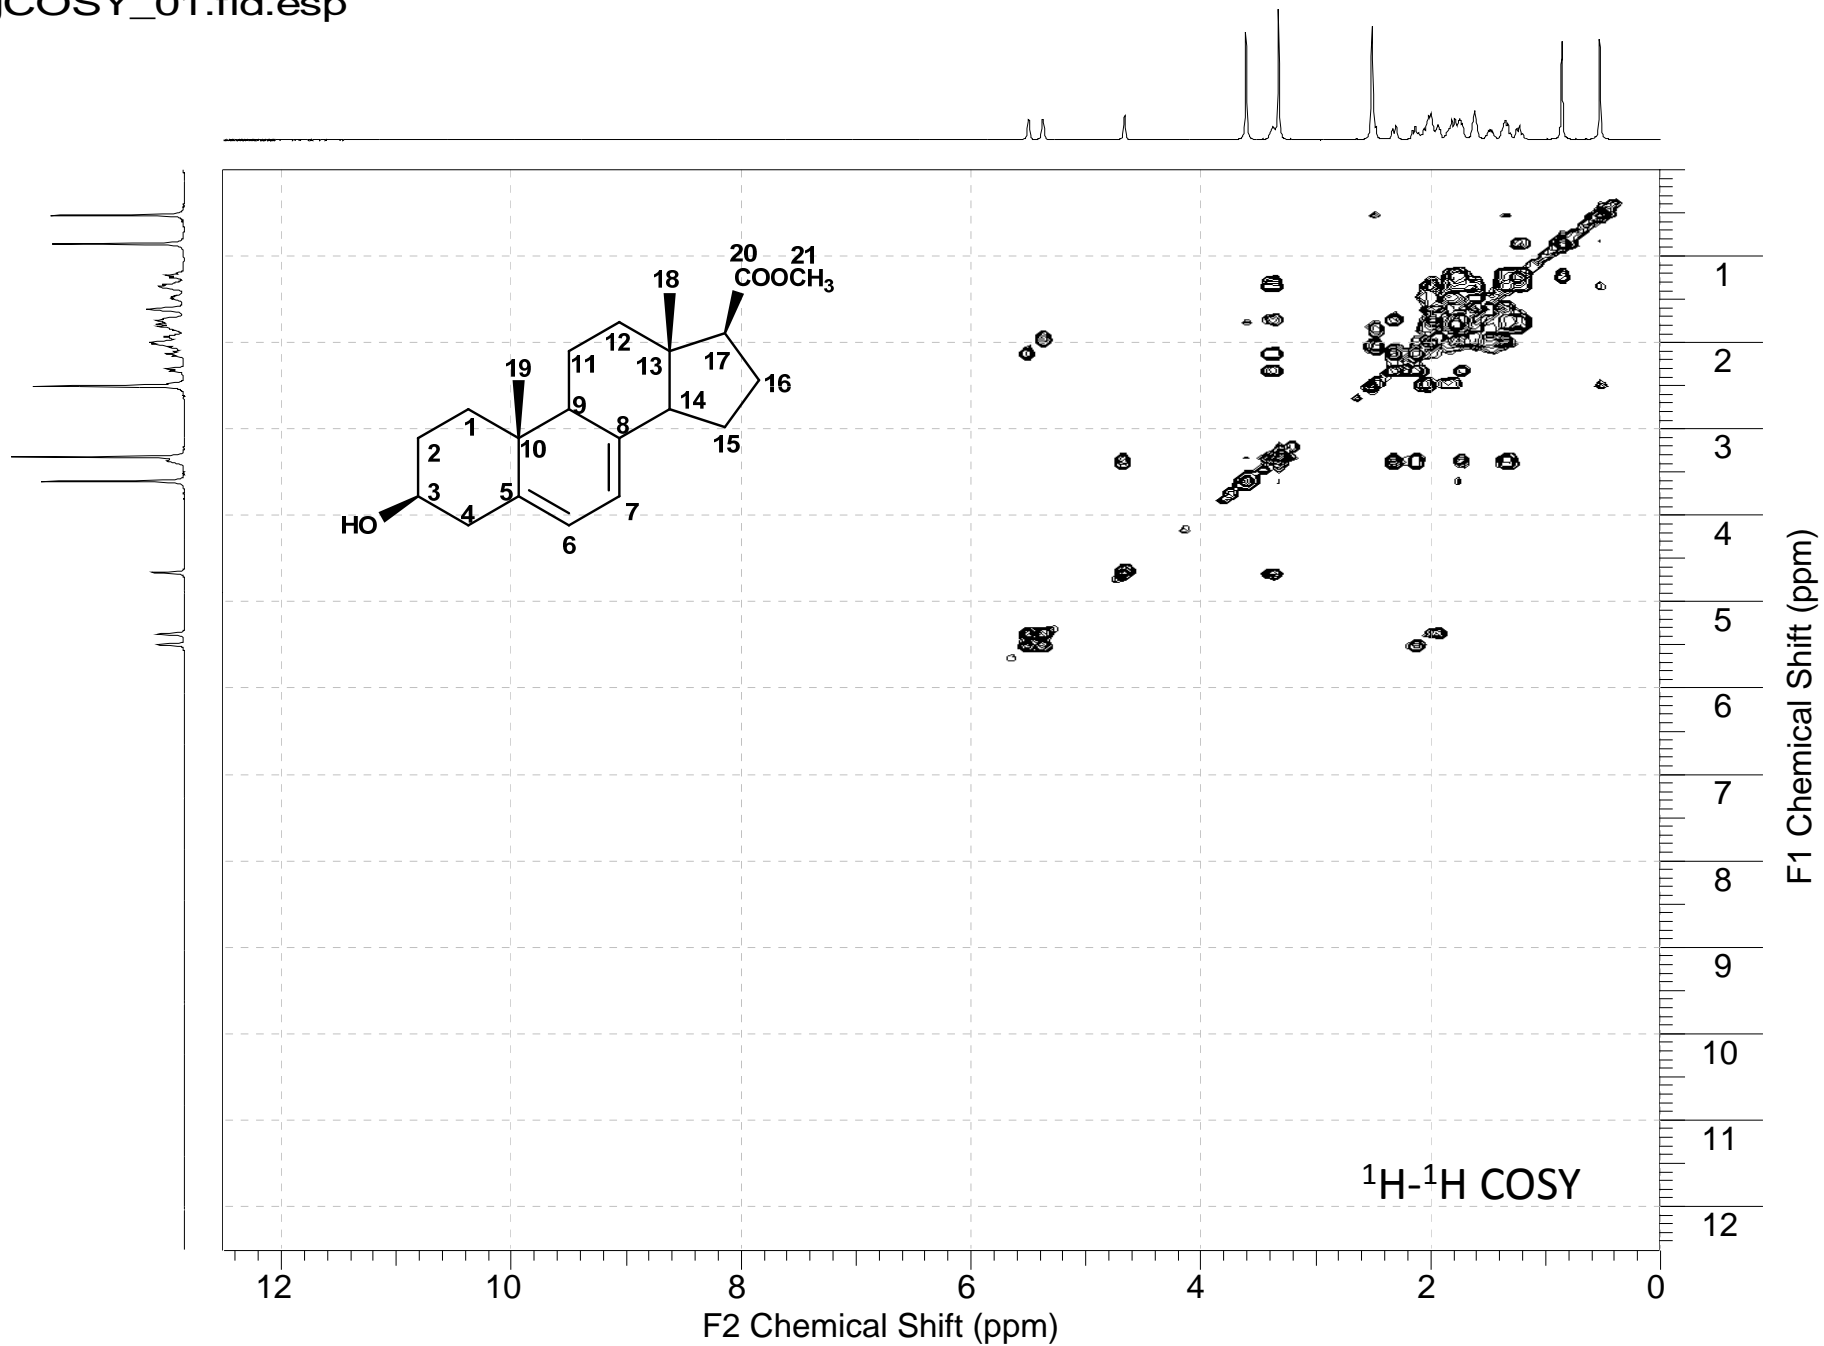

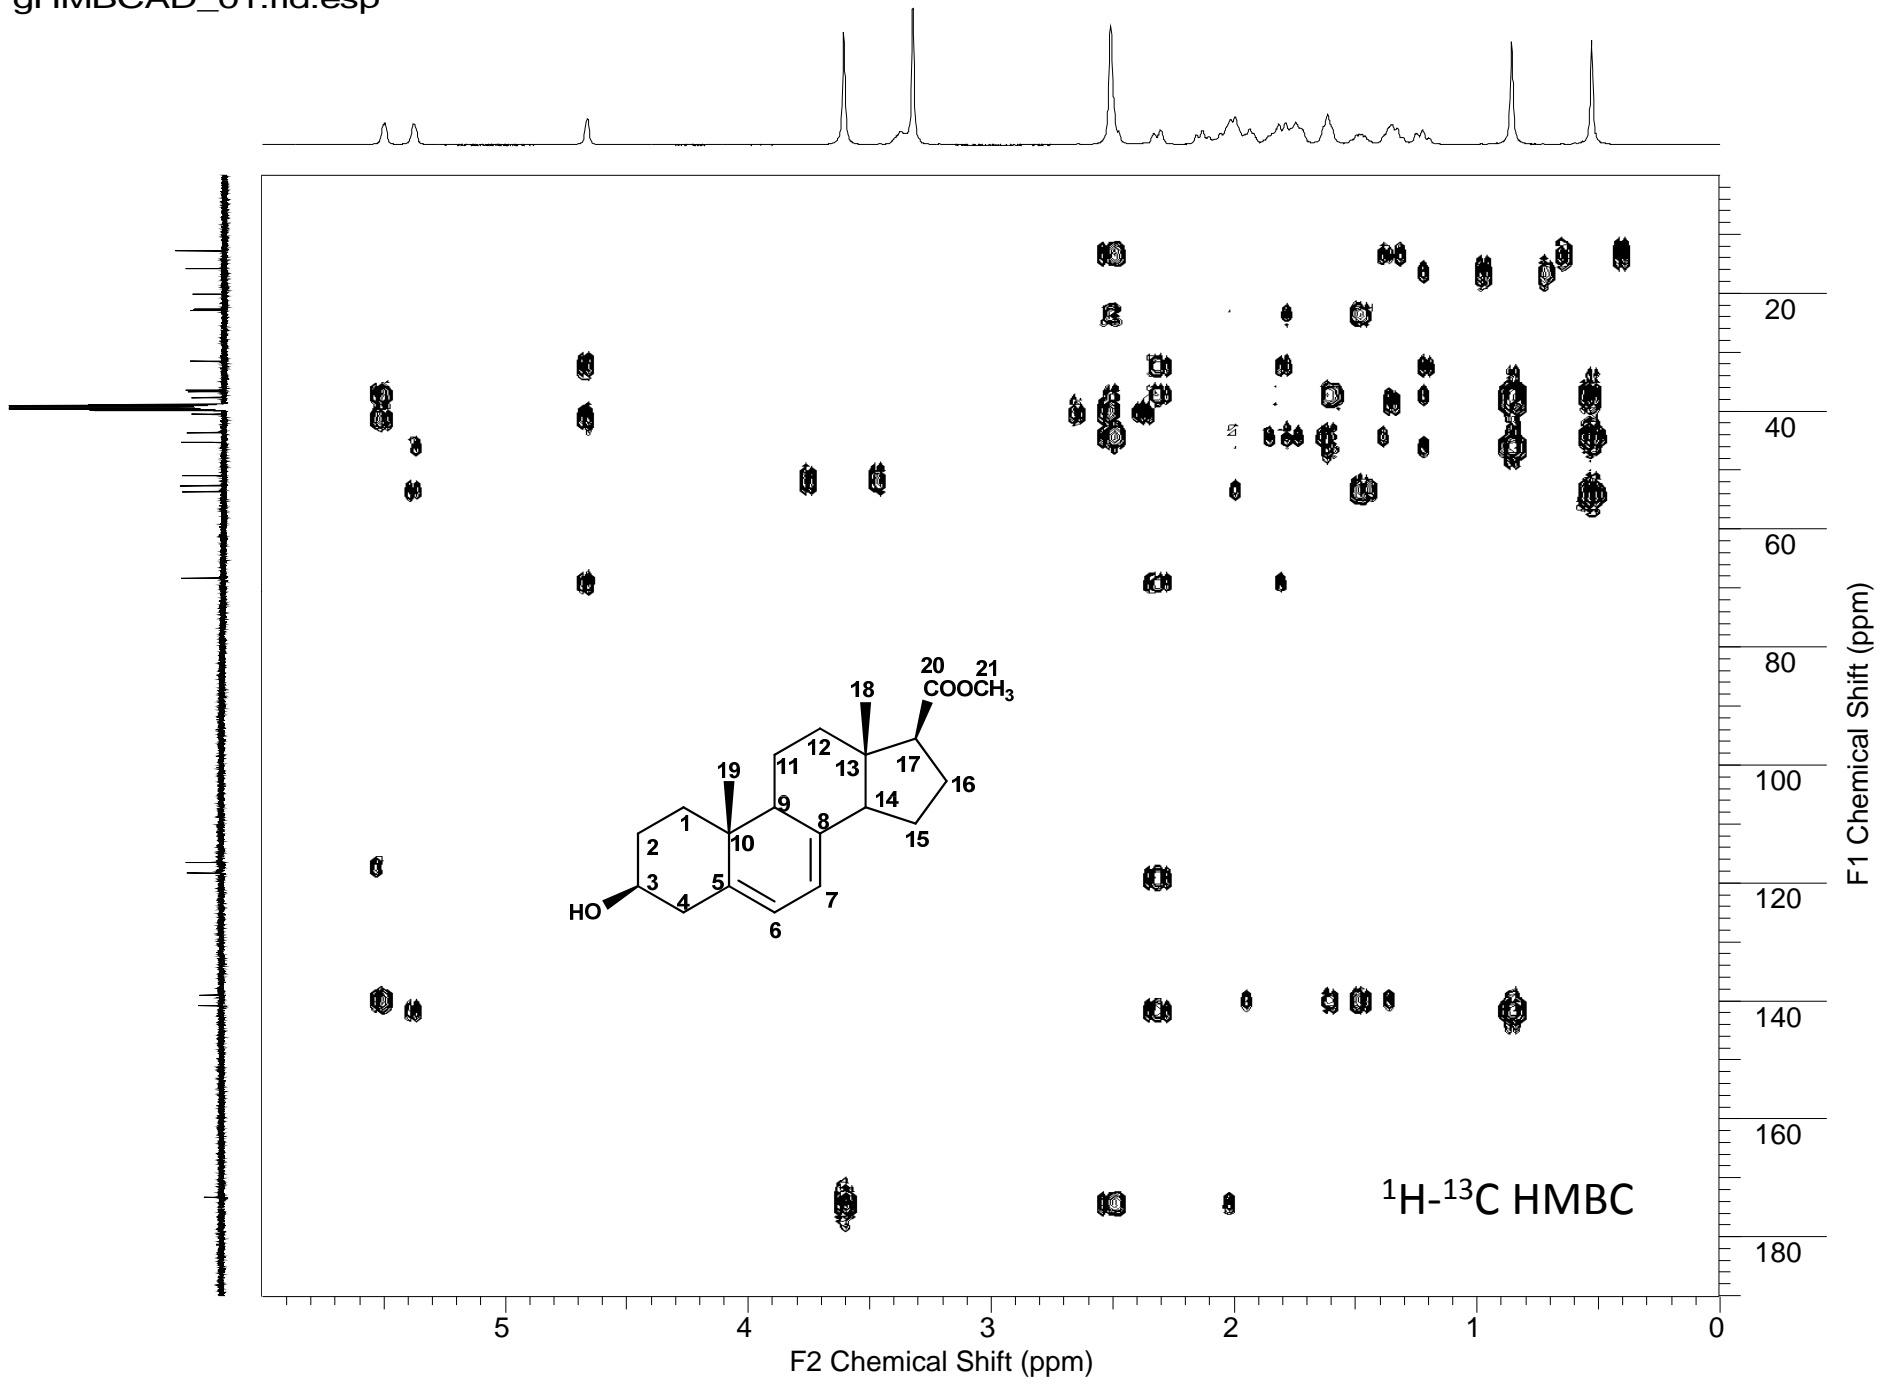

TOCSY\_01.fid.esp

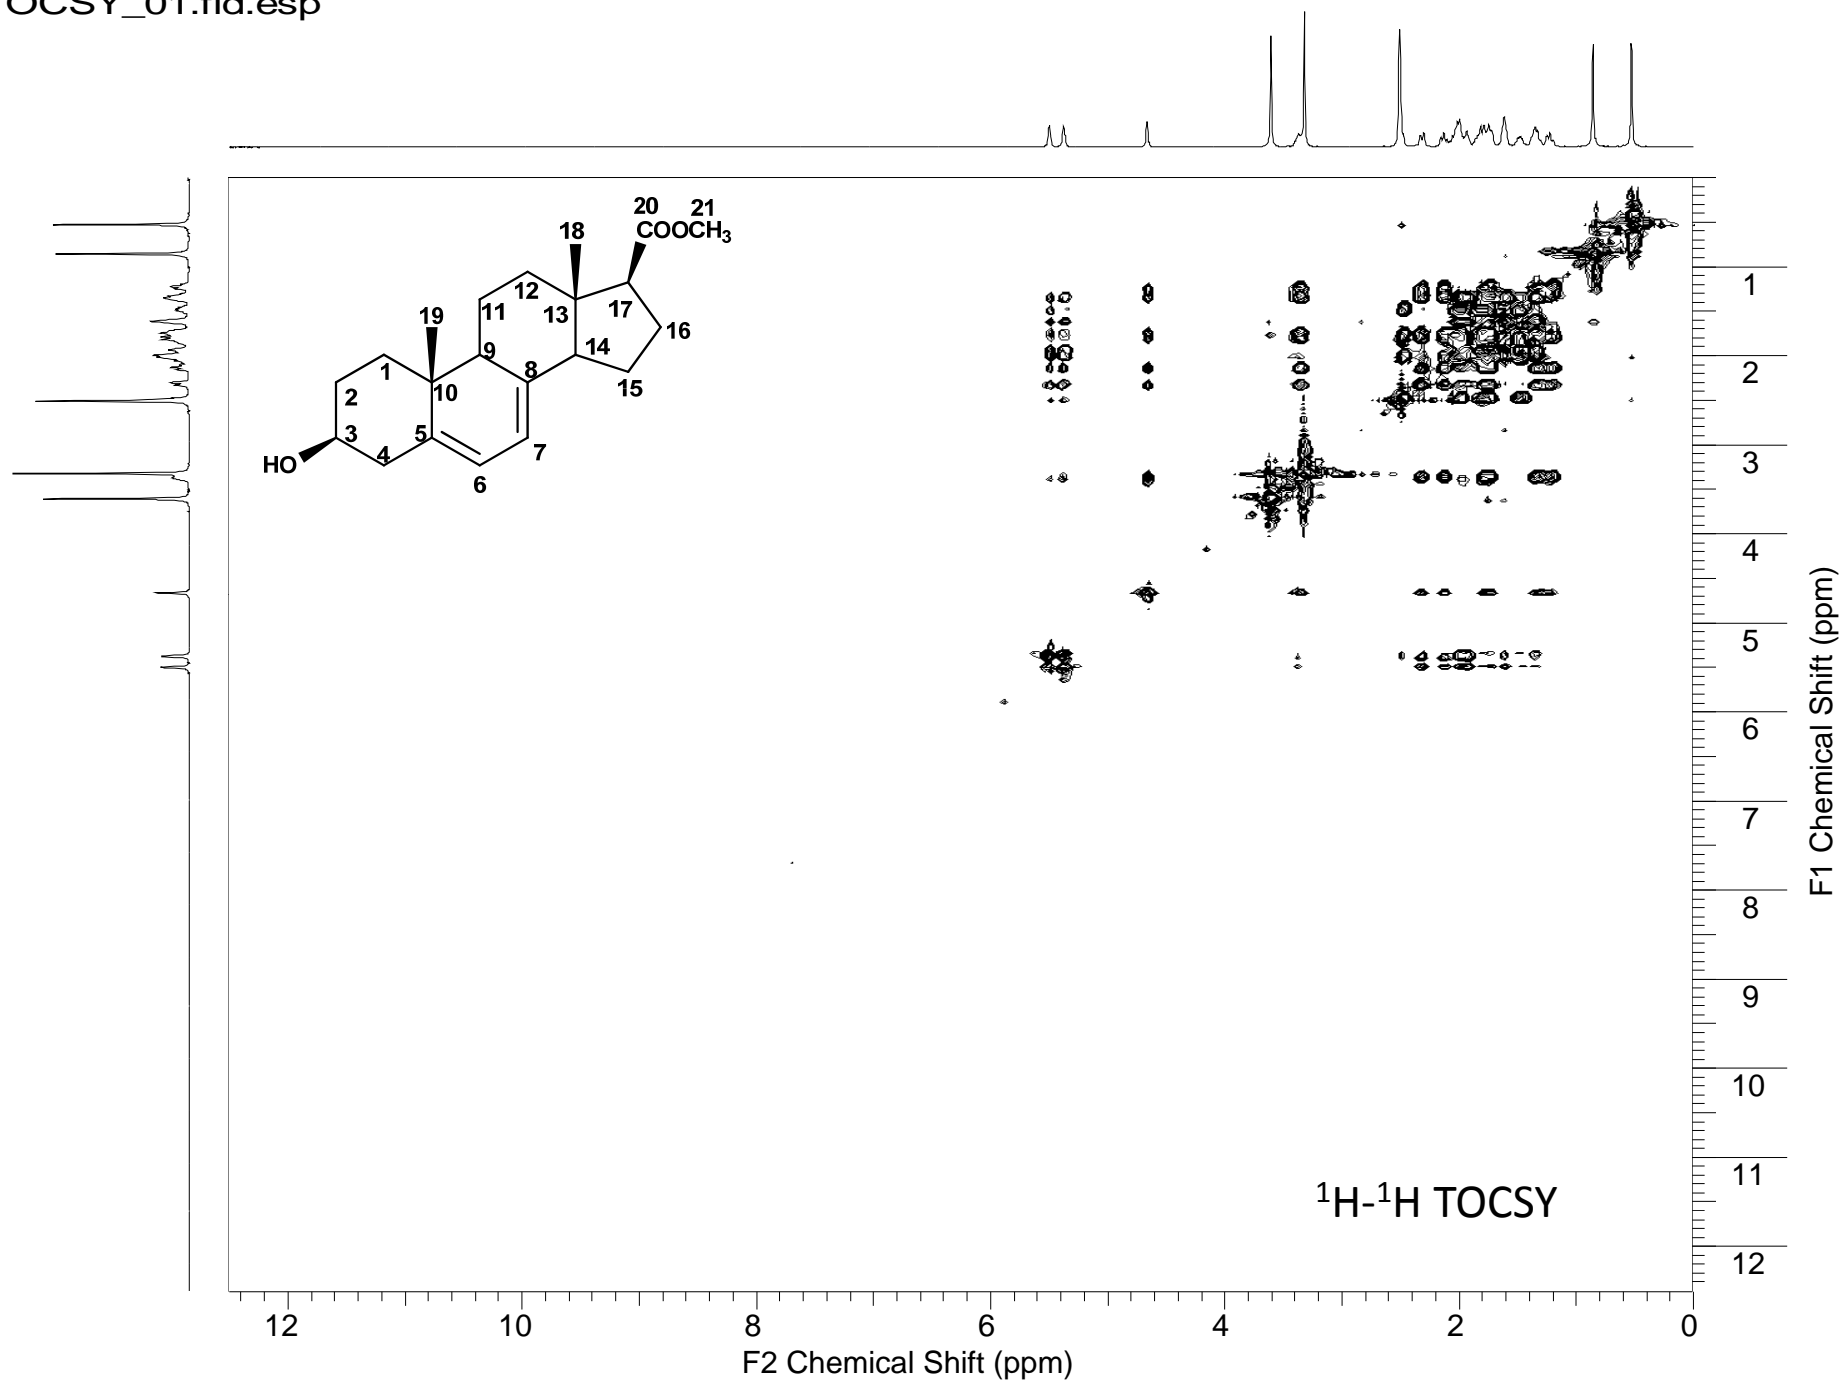

# 17-COOH-Pregnenolone (17-COOH-A)

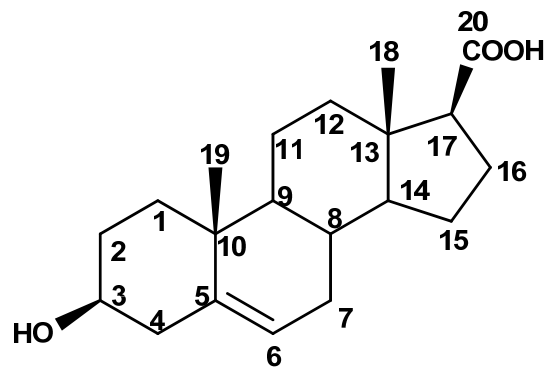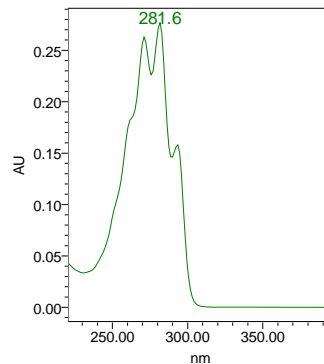

UV spectrum

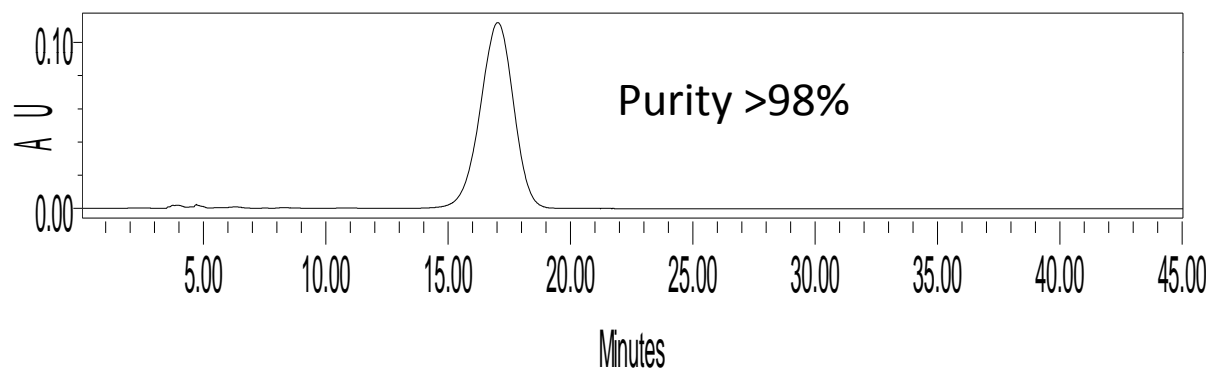

HPLC conditions: isocratic, solvent A (water, 30%) and solvent B (methanol, 70%); running time: 45 min; flow rate: 0.6 mL/min.

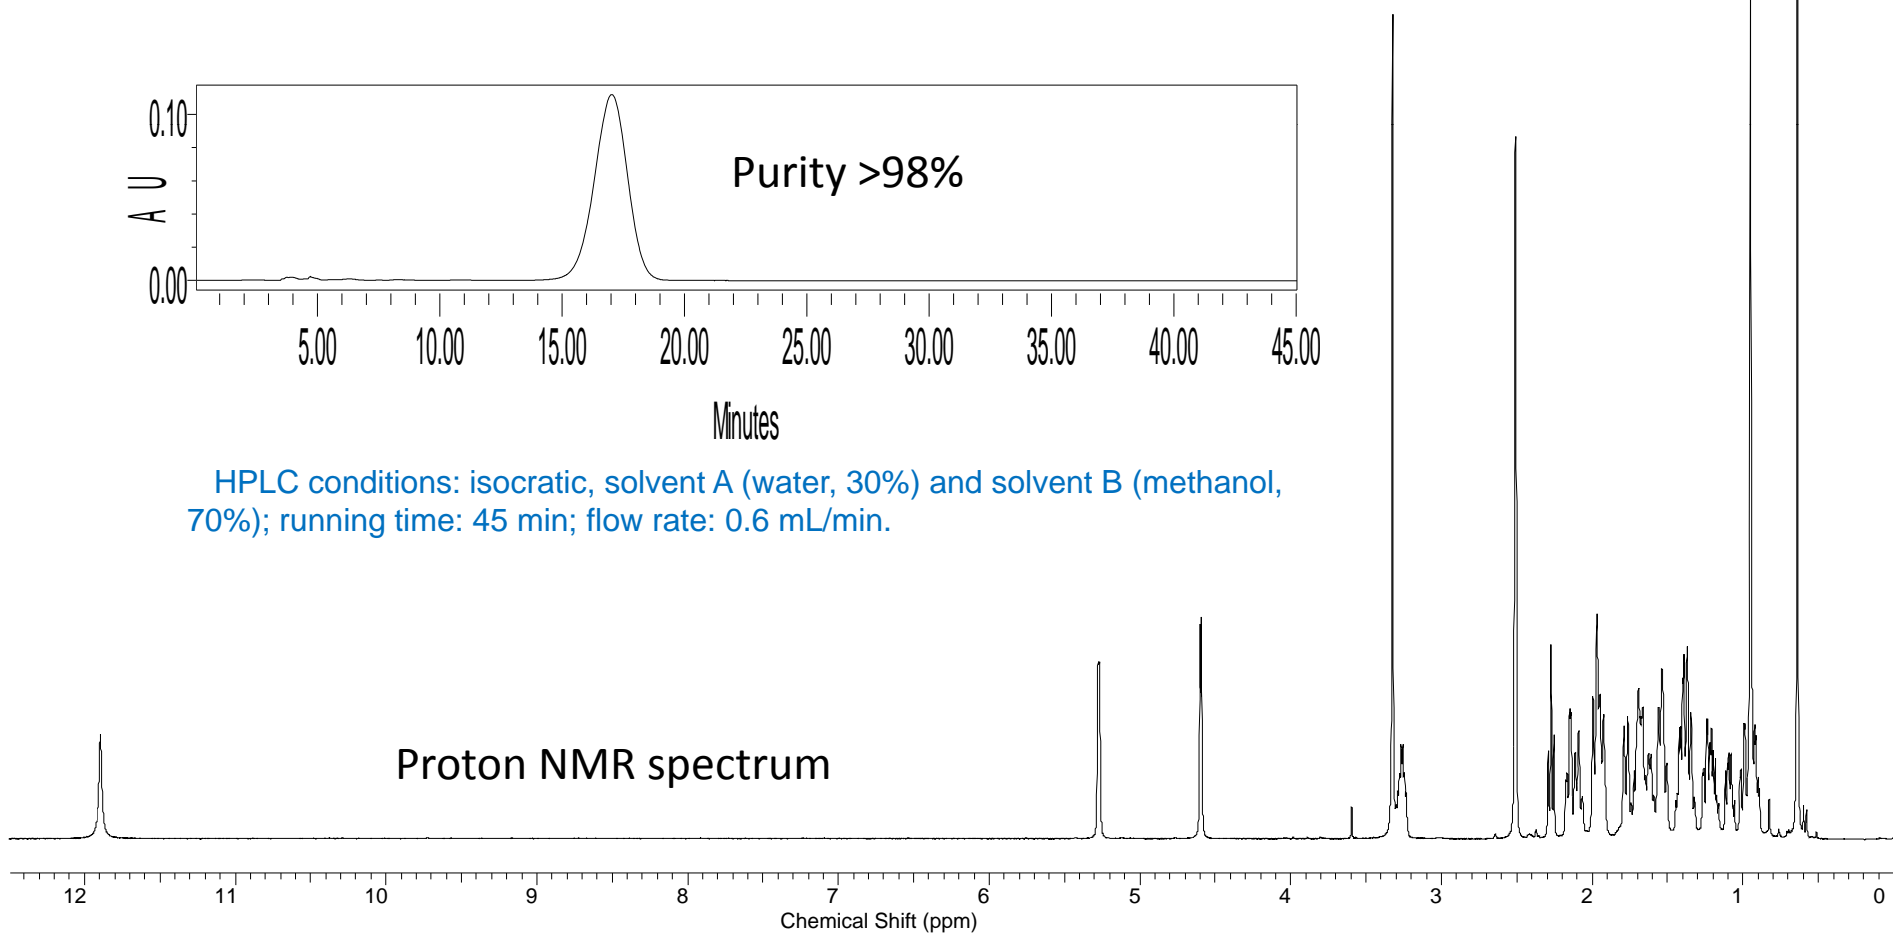

gHSQCAD\_01.fid.esp

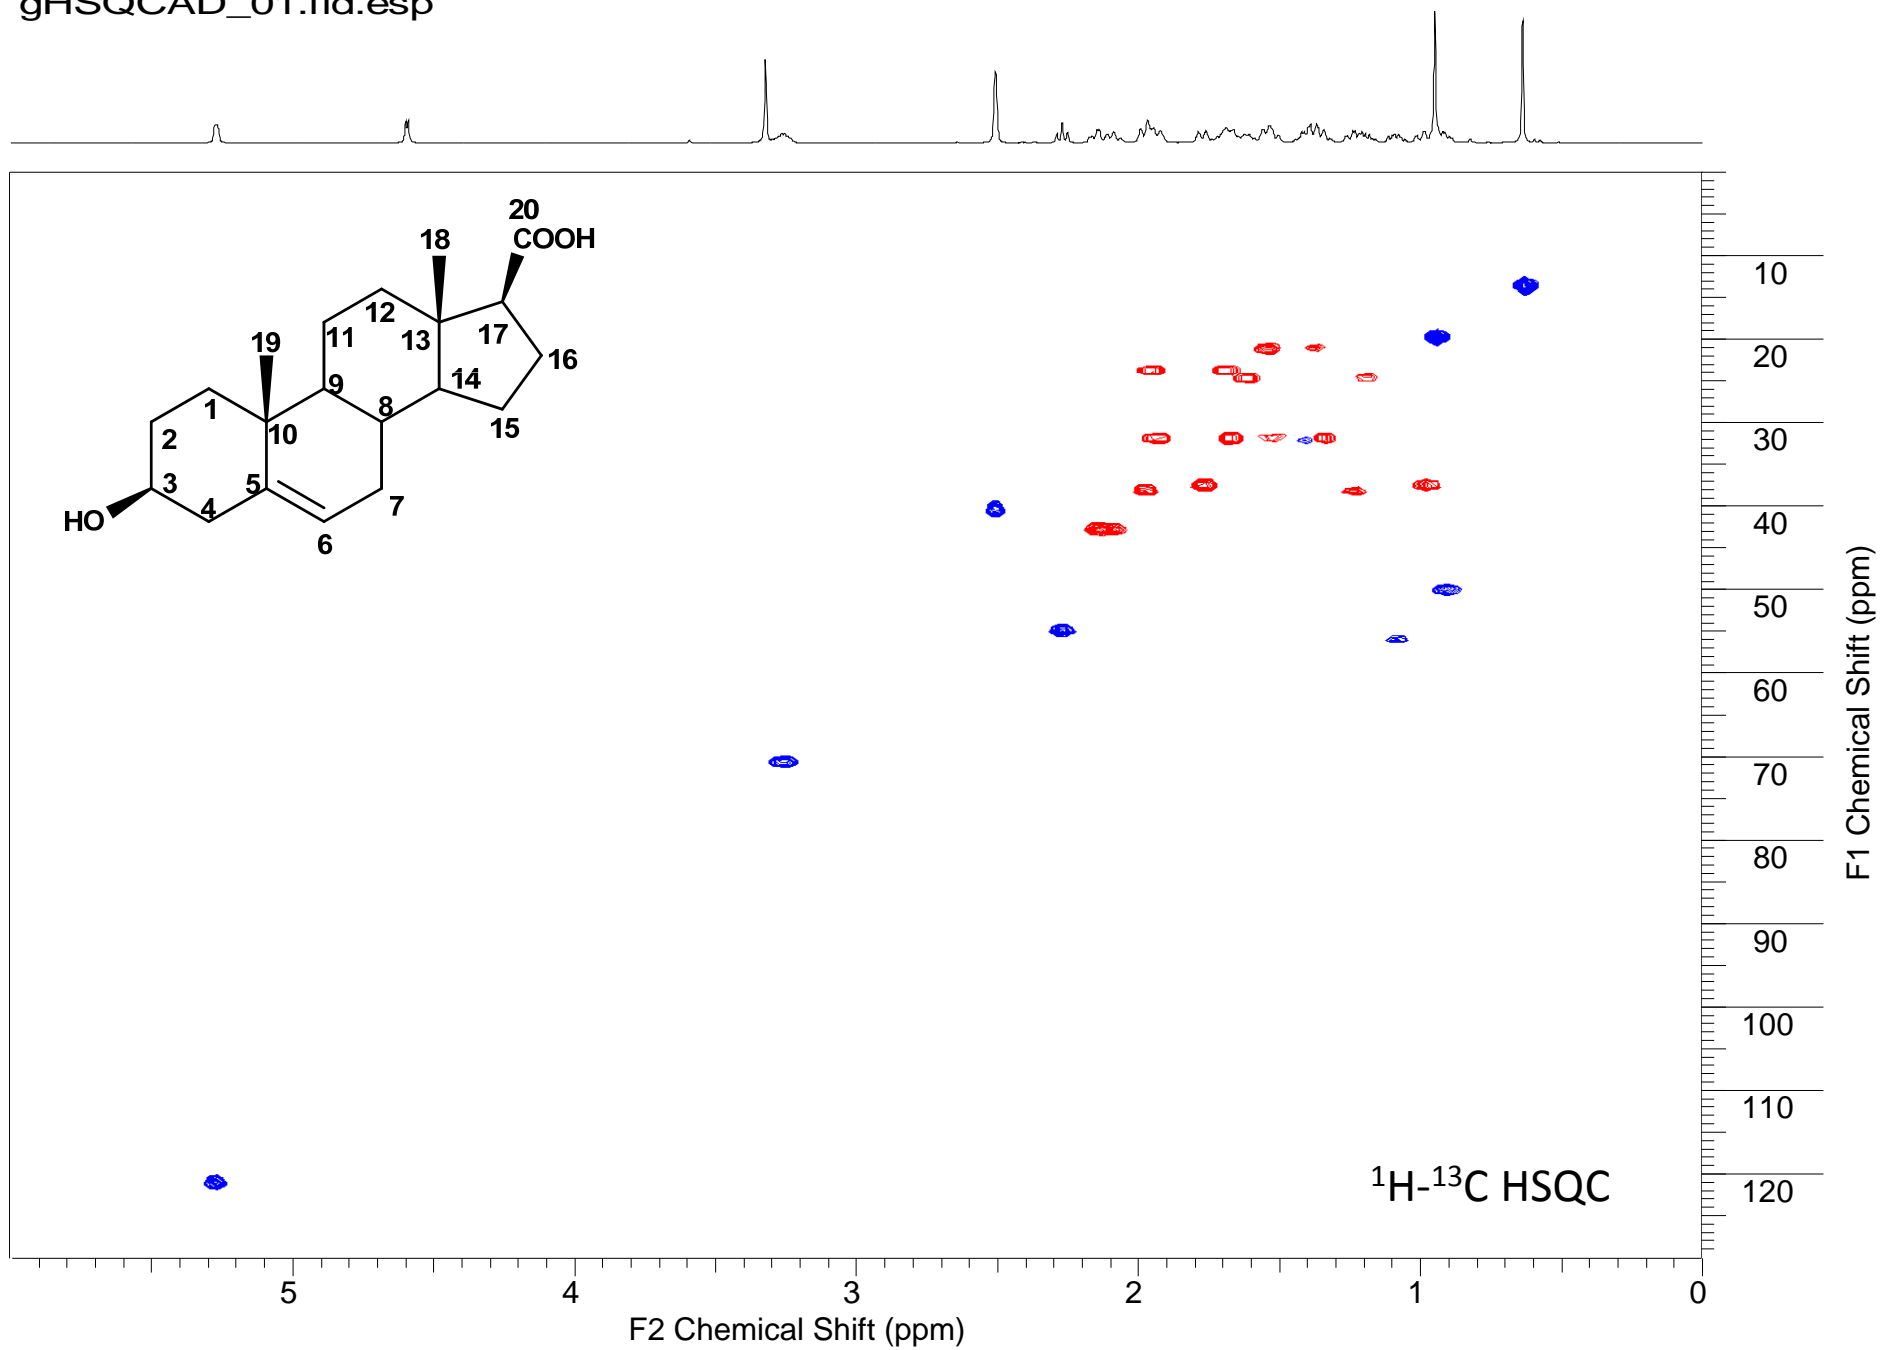

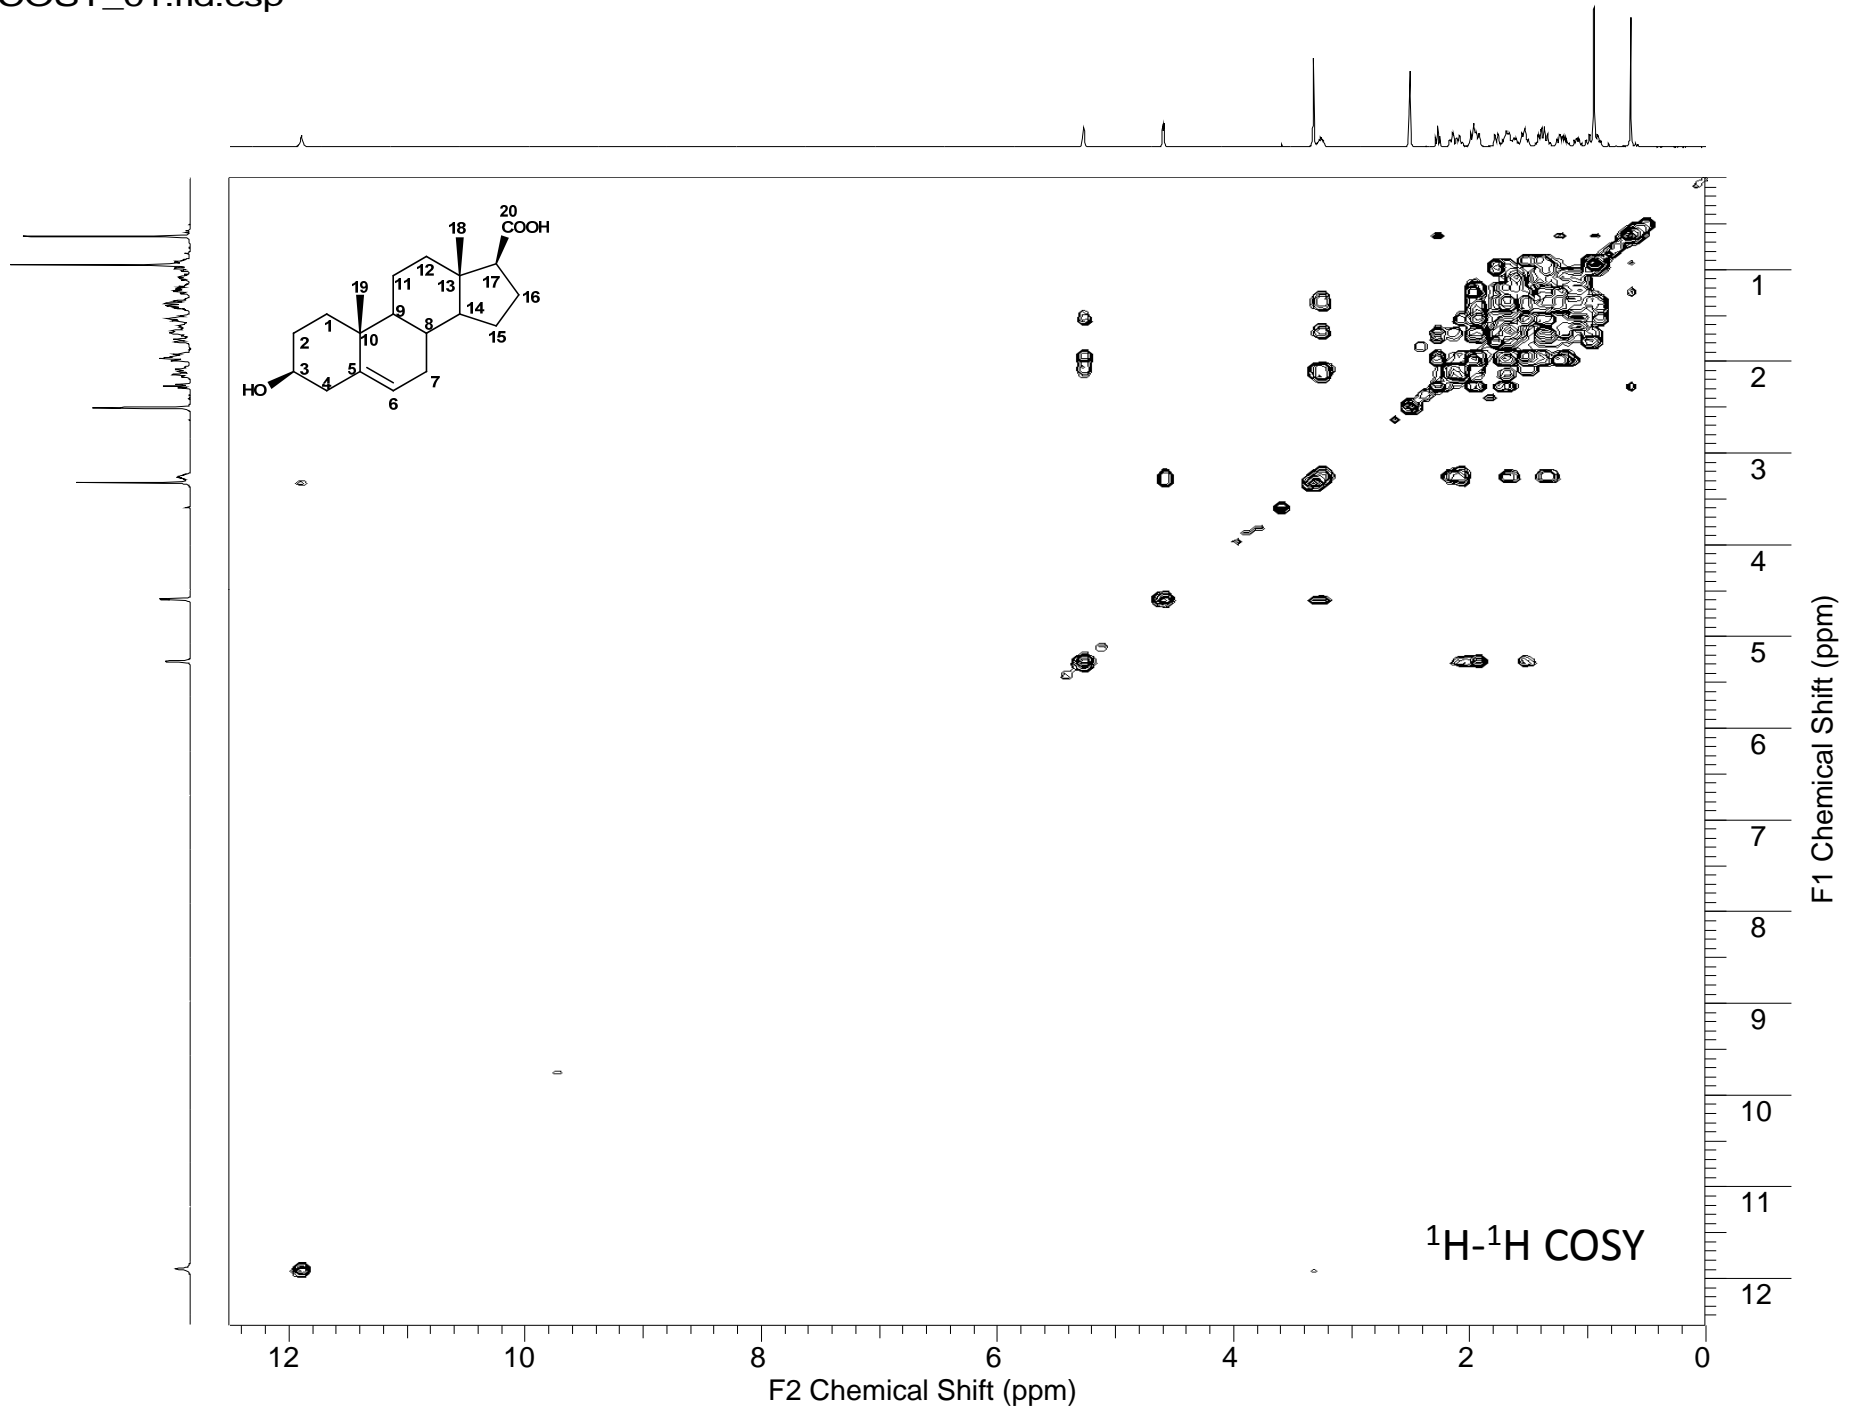



gHMBCAD\_01.fid.esp

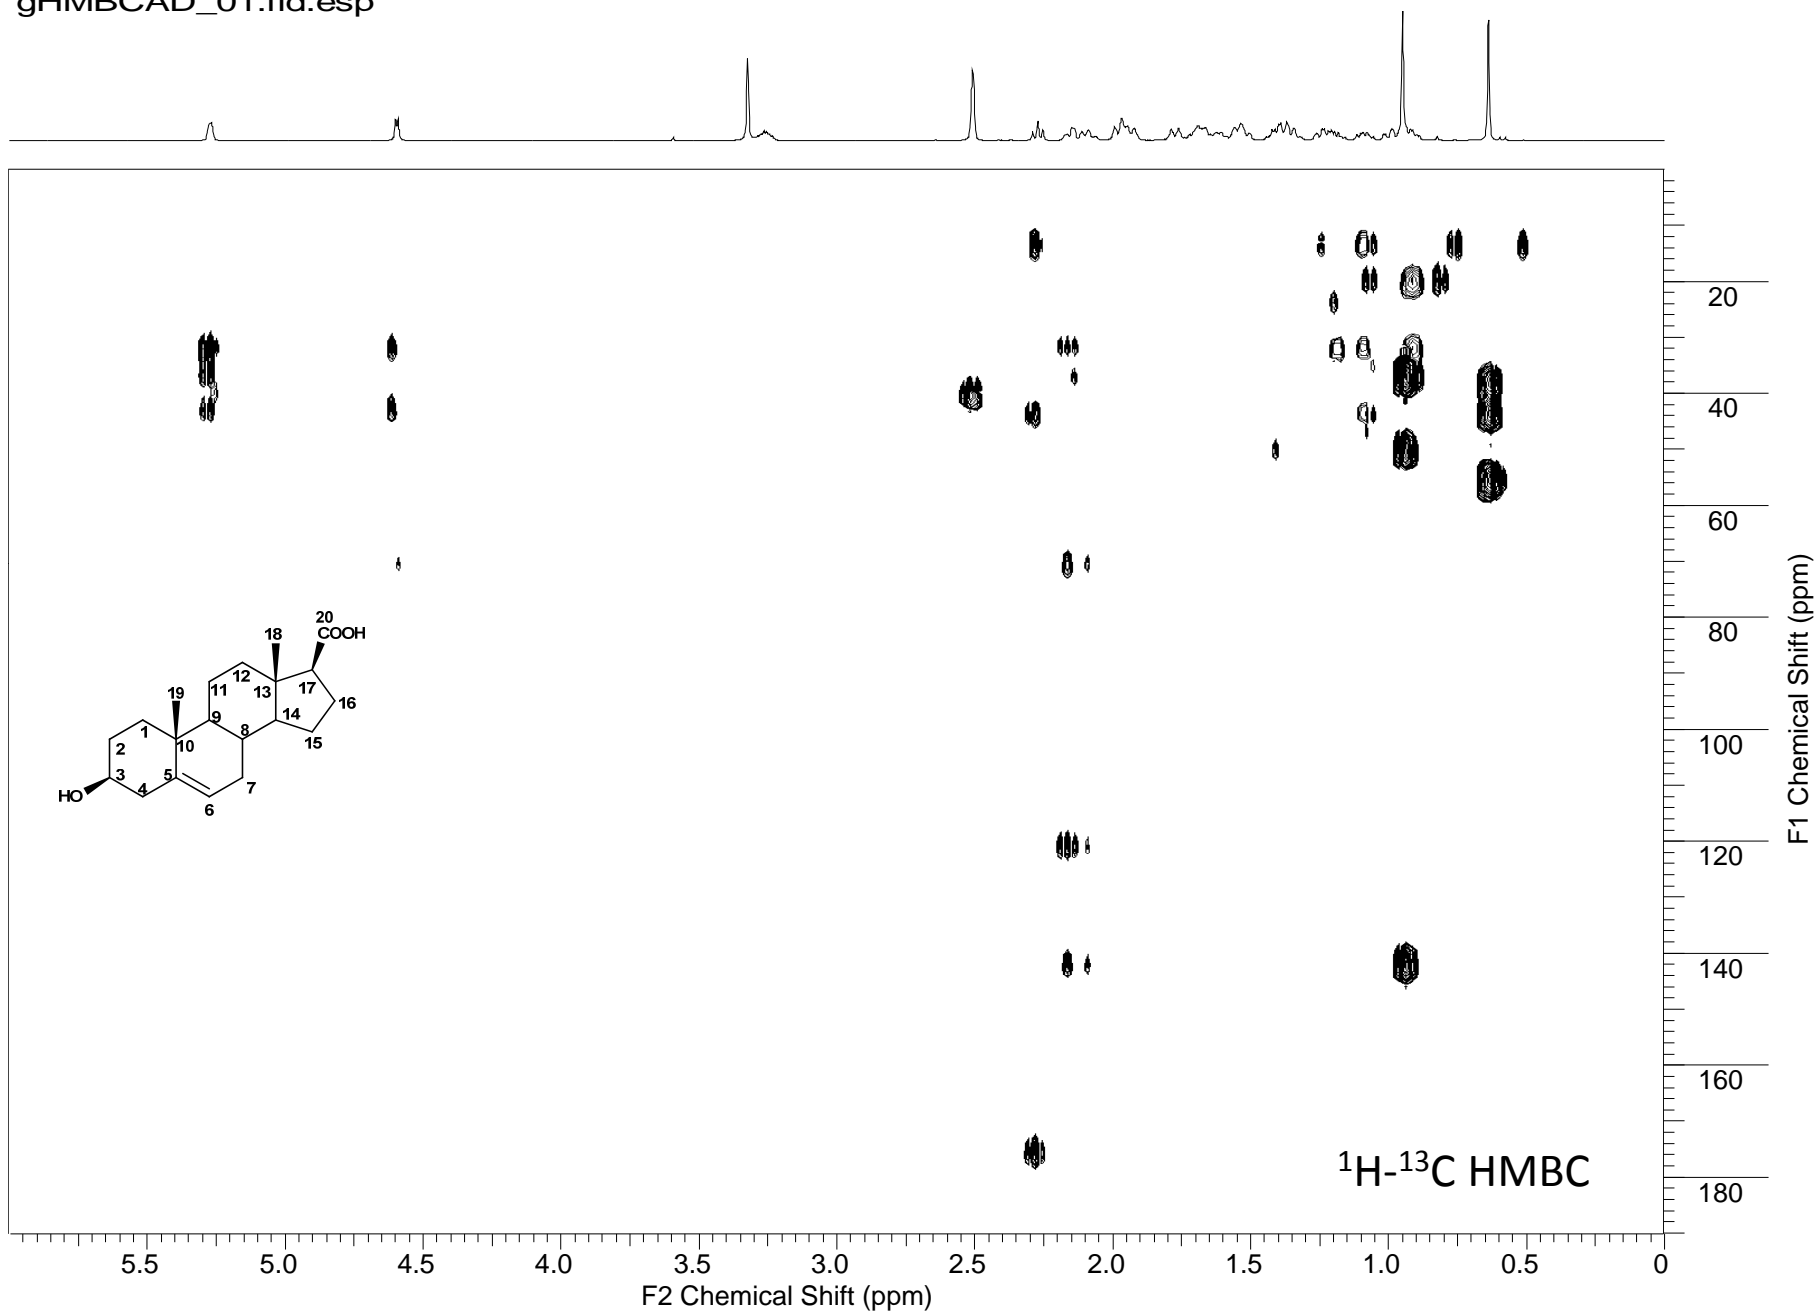

Supplement: NIHMS168521-supplement-01.pdf [file NIHMS168521-supplement-01.pdf]
